# Supplementary material for: Unified epigenomic, transcriptomic, proteomic, and metabolomic taxonomy of Alzheimer’s disease progression and heterogeneity
Source: PubMed Central journal article supplement — Sci Adv. 2022 Nov 18;8(46):eabo6764. doi: 10.1126/sciadv.abo6764 (PMC9674284; doi:10.1126/sciadv.abo6764), 2022-11-18
Supplement: sciadv.abo6764_sm.pdf [file sciadv.abo6764_sm.pdf]

Supplementary Materials for  
**Unified epigenomic, transcriptomic, proteomic, and metabolomic taxonomy  
of Alzheimer's disease progression and heterogeneity**

Yasser Iturria-Medina *et al.*

Corresponding author: Yasser Iturria-Medina, [yasser.iturriamedina@mcgill.ca](mailto:yasser.iturriamedina@mcgill.ca)

*Sci. Adv.* **8**, eabo6764 (2022)  
DOI: 10.1126/sciadv.abo6764

**This PDF file includes:**

Supplementary Text S1  
Figs. S1 to S4  
Tables S1 to S5

**Text S1** | Neuropathological measurements considered from ROSMAP dataset: Hippocampal sclerosis, arteriolosclerosis, amyloid angiopathy, atherosclerosis, vascular infarcts, chronic microinfarcts, diffuse plaques angular gyrus, diffuse plaques entorhinal, diffuse plaques hippocampus, diffuse plaques midfrontal, diffuse plaques mesial temporal, amyloid angular gyrus, amyloid calcarine, amyloid cingulate, amyloid entorhinal, amyloid hippocampus, amyloid inferior temporal, amyloid mesial temporal, amyloid midfrontal, amyloid superior frontal, PHF tangles angular gyrus, PHF tangles entorhinal, PHF tangles hippocampus, PHF tangles midfrontal, PHF tangles mesial temporal, tangles angular gyrus, tangles calcarine, tangles cingulate, tangles entorhinal, tangles hippocampus, tangles inferior temporal, tangles mesial temporal.

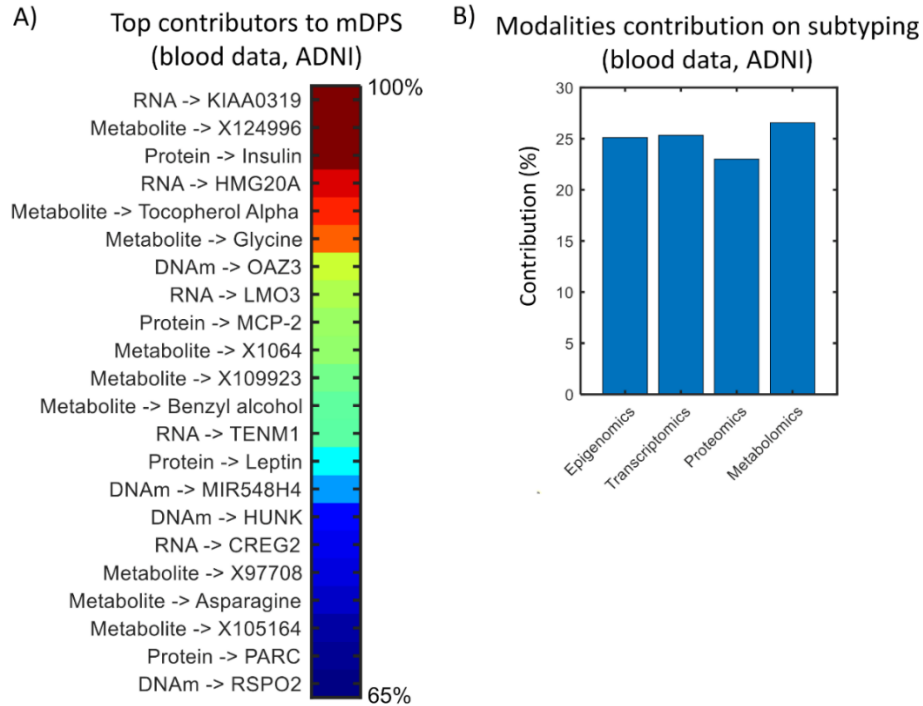

**Figure S1** | Molecular omics contributions to AD stratification in *in-vivo* blood tissue. A) Top influential epigenetic, transcriptomic, proteomic, and metabolomic markers during the process of AD trajectories inference. Values are percentages, normalized with regards the maximum (only markers over the 99 percentile are shown; for an extended list, see Table S4). B) Modalities-specific contributions (in percentages) to the identified AD subtypes. For technical details, see *Methods*, subsections *Assessing markers contributions on mDPS* and *Assessing omics contributions on subtyping*, respectively.

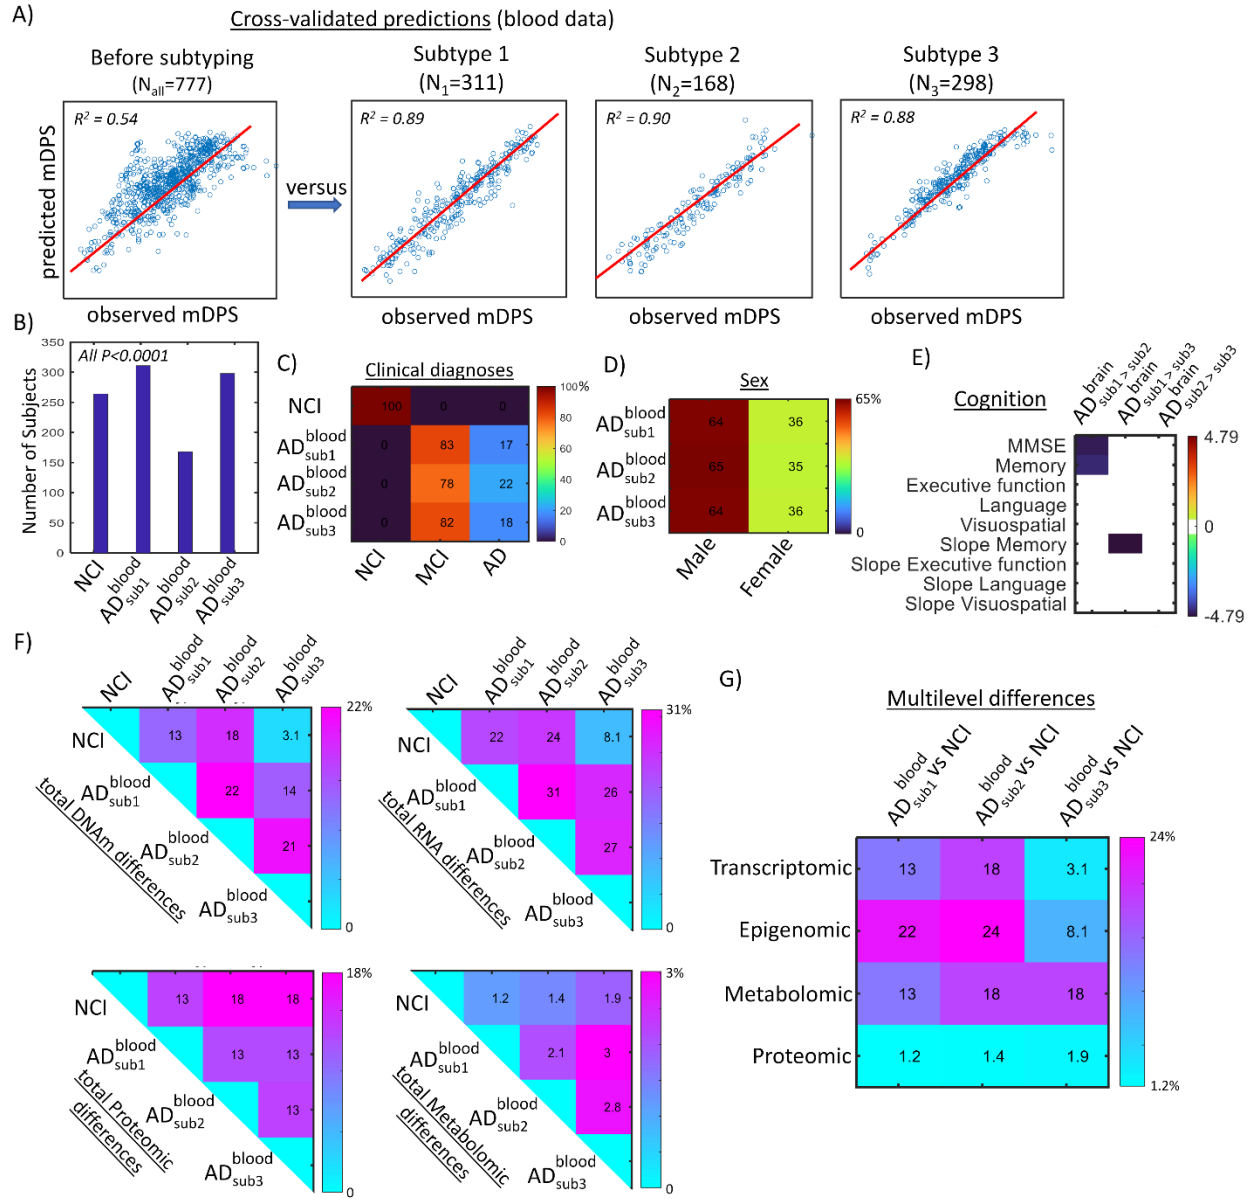

**Figure S2** | Three distinctive AD subtypes identified with multi-omics molecular data from the blood (ADNI). **A)** Cross-validation analysis for identifying the most-likely stratification in terms of predictability of pathological advance. Notice that the decomposition of the whole population in smaller/stable subgroups implies a significant improvement in internal data homogeneity and multi-omics mDPS predictability. **B)** Number of samples per subtype and corresponding significance obtained with randomization testing (all  $P < 0.001$ , FEW-corrected). **C-D)** Subtypes specific clinical diagnoses and sex proportions, respectively. **E) Inter-subtypes differences in cognitive variables and their rates of change over time (all  $P < 0.05$ , FEW-corrected, based on ANOVA tests with permutations).** Only significant differences are shown, with values corresponding to explained variance and signs reflecting direction (for slopes, a positive value would indicate stronger cognitive decline for the first specified subtype, while a negative value would indicate the contrary). **F-G)** Total inter-subgroups molecular and neuropathological differences. For each data type and comparison with control population, each matrix element

corresponds to the percent of significantly different features (all  $q < 0.05$ , FDR corrected, based on ANOVA tests with subtype as grouping variable; *Materials and Methods, Statistical Analyses*). For each subtype-subtype matrix element, the reported value represents the percent of data features that are abnormal for one subtype but not for the other (mismatch level).

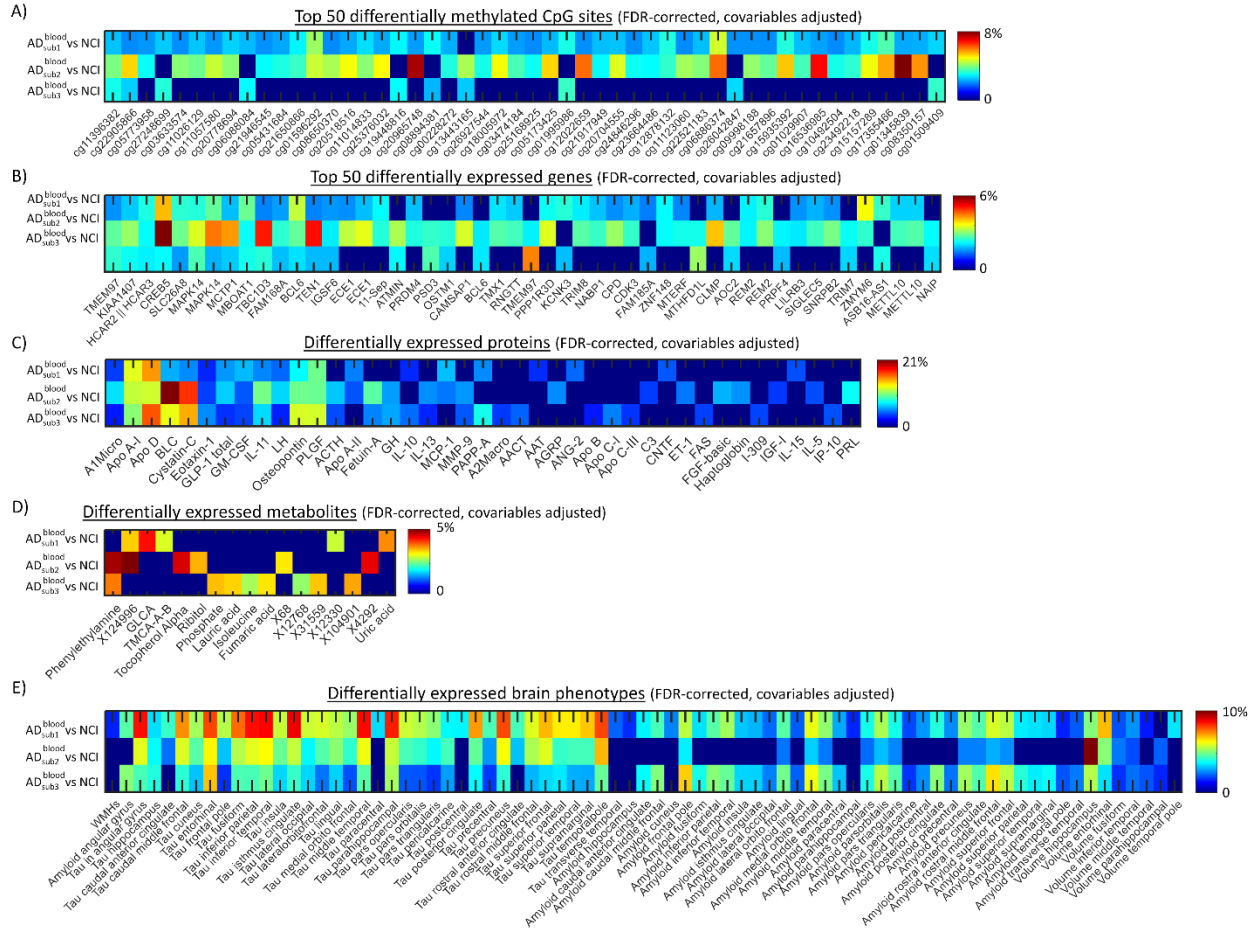

**Figure S3 |** Differentially expressed genes, CpG sites, proteins, metabolites, and brain phenotypes in blood-based AD subtypes. Only significantly expressed features are presented ( $q < 0.05$  FDR-corrected). ANOVA tests with subtype as grouping variable were used (data was previously adjusted by age, sex, educational level and experimental confounders; *Materials and Methods, Multi-omics cTI definition*). Color scale corresponds to explained variance. For RNA and DNAm, only the top 50 most significant genes and CpG sites are presented, respectively.

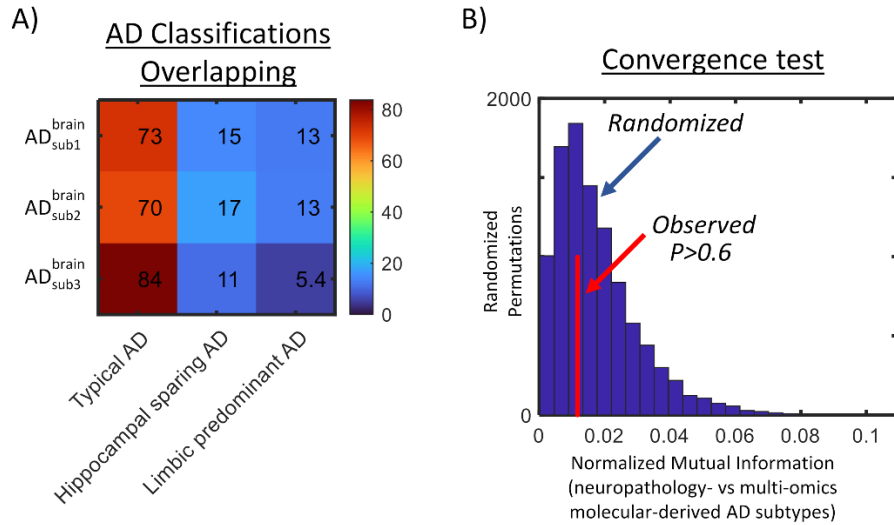

**Figure S4** | Multi-omics molecular-derived vs Neuropathology-based AD classifications. A) Subtypes overlapping across the two different classification systems. For each multi-level molecular AD subtype, the reported values correspond to the percentages of participants identified as typical AD (tAD), hippocampal sparing (HpSp), and limbic predominant (LP) AD (15, 40), respectively. B) Convergence test comparing normalized mutual information between the two independently obtained AD stratifications. For technical details, see *Methods*, subsection *Comparative analysis with neuropathological subtypes*.

**Table S1** | Main demographic and data characteristics for the two populations. Of note, all subjects have at least two different molecular data types.

| Variable          | ROSMAP<br>(N=822)                            | ADNI<br>(N=1041) |
|-------------------|----------------------------------------------|------------------|
| Women             | 532 (64.7%)                                  | 440 (42%)        |
| Age (years)       | 86.6 (4.59)                                  | 73.9 (7.18)      |
| Education (years) | 16.3 (3.51)                                  | 15.8 (2.85)      |
| NCI               | 274 (33.3%)                                  | 264 (25%)        |
| RNA               | Brain: 489 (59.4%),<br>Monocytes: 168 (20 %) | 658 (63 %)       |
| DNAm              | 708 (86.1%)                                  | 595 (57 %)       |
| Metabolomics      | 111 (14%)                                    | 635 (61 %)       |

|                                                                                             |            |            |
|---------------------------------------------------------------------------------------------|------------|------------|
| Proteomics                                                                                  | 822 (100%) | 551 (53 %) |
| Neuropathological<br>(based on <i>post-mortem</i> evaluations<br>or <i>in-vivo</i> PET/MRI) | 822 (100%) | 610 (58 %) |

Data are number (%) or mean (std).

**Table S2** | Top markers contributing to the multi-omics molecular AD progression scores.

| Tissue              | Markers                                                                                                                                                                                                                                                                                                                                                                                                                                                                                                                                                                                                                                                                                                                                                                                                                                                                                                                                                                                                                                                                                                                                                                                                                                                                                                                                                                                                                                                                                                                                                                                                                                                                                                                                                                                                                                                                                                                                                                         |
|---------------------|---------------------------------------------------------------------------------------------------------------------------------------------------------------------------------------------------------------------------------------------------------------------------------------------------------------------------------------------------------------------------------------------------------------------------------------------------------------------------------------------------------------------------------------------------------------------------------------------------------------------------------------------------------------------------------------------------------------------------------------------------------------------------------------------------------------------------------------------------------------------------------------------------------------------------------------------------------------------------------------------------------------------------------------------------------------------------------------------------------------------------------------------------------------------------------------------------------------------------------------------------------------------------------------------------------------------------------------------------------------------------------------------------------------------------------------------------------------------------------------------------------------------------------------------------------------------------------------------------------------------------------------------------------------------------------------------------------------------------------------------------------------------------------------------------------------------------------------------------------------------------------------------------------------------------------------------------------------------------------|
| Brain (ROSMAP data) | RNA -> HOXC9, Metabolite -> 6-ketoLCA, Protein -> tau_77G7, DNAm -> PRDM6, RNA -> TCEB3B, DNAm -> NRN1L, Metabolite -> C0, Metabolite -> PC aa C38:3, DNAm -> C3orf55, DNAm -> JAK1, Metabolite -> LCA, RNA -> PFKP, DNAm -> C2orf42, DNAm -> KPNA2, Metabolite -> LCA-3S, DNAm -> DISC1, DNAm -> SLC2A4RG, Metabolite -> Putrescine, RNA -> HS.564153, Metabolite -> NorDCA, DNAm -> TTLL13, Metabolite -> Spermidine, Metabolite -> PC aa C34:2, DNAm -> APOLD1, Metabolite -> C4:1, Metabolite -> GHCA, RNA -> LRP8, DNAm -> PLAG1, DNAm -> WDR67, DNAm -> AKAP12, DNAm -> MIR379, DNAm -> CYP27C1, DNAm -> KCTD8, Metabolite -> CDCA, DNAm -> CFD, DNAm -> PFN1, Metabolite -> lysoPC a C18:2, DNAm -> ERGIC1, DNAm -> RABIF, DNAm -> EML1, DNAm -> TMEM150A, Metabolite -> Spermine, DNAm -> KIF22, Metabolite -> t4-OH-Pro, DNAm -> HIF1AN, DNAm -> SDK1, Metabolite -> PC aa C24:0, DNAm -> PAPOLB, Protein -> tau_AT100_t217, RNA -> KRT13, RNA -> HIST1H2BO, Metabolite -> C16-OH, Metabolite -> 12-ketoLCA, RNA -> LOC642521, DNAm -> TDG, DNAm -> OR51S1, RNA -> RXRG, DNAm -> TRIP10, RNA -> HS.145476, DNAm -> SLC1A3, DNAm -> G3BP1, RNA -> ZNF334, DNAm -> GOLPH3L, DNAm -> PBLD, DNAm -> HRK, RNA -> ADAD2, DNAm -> ZNF266, RNA -> HS.550430, Metabolite -> TUDCA, DNAm -> RPLP0, RNA -> LOC153328, DNAm -> FLOT1, DNAm -> ABCA2, RNA -> ARHGAP9, RNA -> POMT1, DNAm -> UCRC, DNAm -> MGC23284, DNAm -> RPS24, DNAm -> MYOM2, DNAm -> LMNB2, DNAm -> GRHL2, DNAm -> TP53INP2, DNAm -> GLG1, DNAm -> CSMD1, DNAm -> RNU5E, Metabolite -> GHDCa, Metabolite -> TCA, DNAm -> PAPOLB, DNAm -> RNH1, DNAm -> OPCML, RNA -> LOC440934, DNAm -> PAPOLB, RNA -> HS.407028, RNA -> SEC22C, Metabolite -> lysoPC a C16:1, DNAm -> COMP, Metabolite -> bUCA, Metabolite -> Cit, DNAm -> FAM41C, Metabolite -> PC aa C40:2, DNAm -> CNNM4, DNAm -> PCDHGA4, Metabolite -> Creatinine, Metabolite -> SDMA, DNAm -> SNORD53, DNAm -> SIGLEC6, DNAm -> FAM155A, DNAm -> TRIP10 |
| Blood (ADNI data)   | RNA -> KIAA0319, Metabolite -> X124996, Protein -> Insulin, RNA -> HMG20A, Metabolite -> TOCOPHEROL.ALPHA, Metabolite -> Glycine, DNAm -> OAZ3, RNA -> LMO3, Protein -> Monocyte Chemotactic Protein 2 (MCP-2), Metabolite -> X1064, Metabolite -> X109923, Metabolite -> BENZYLALCOHOL, RNA -> TENM1, Protein -> Leptin (ng/mL), DNAm -> MIR548H4, DNAm -> HUNK, RNA -> CREG2, Metabolite -> X97708, Metabolite -> ASPARAGINE, Metabolite -> X105164, Protein -> Pulmonary and Activation-Regulated Chemo, DNAm -> RSPO2, DNAm -> TBX5, Protein -> C-peptide (ng/ml), DNAm -> ATOH1, Metabolite -> X43729, Metabolite ->                                                                                                                                                                                                                                                                                                                                                                                                                                                                                                                                                                                                                                                                                                                                                                                                                                                                                                                                                                                                                                                                                                                                                                                                                                                                                                                                                       |

|  |                                                                                                                                                                                                                                                                                                                                                                                                                                                                                                                                                                                                                                                                                                                                                                                                                                                                                                                                                                                                                                                                                                                                                                                                                                                                                                                                                                                                                                                                                                                                                                                                                                                                                                                                                                                                                                                                                                                                                                                                                                                                                                                                                                                                      |
|--|------------------------------------------------------------------------------------------------------------------------------------------------------------------------------------------------------------------------------------------------------------------------------------------------------------------------------------------------------------------------------------------------------------------------------------------------------------------------------------------------------------------------------------------------------------------------------------------------------------------------------------------------------------------------------------------------------------------------------------------------------------------------------------------------------------------------------------------------------------------------------------------------------------------------------------------------------------------------------------------------------------------------------------------------------------------------------------------------------------------------------------------------------------------------------------------------------------------------------------------------------------------------------------------------------------------------------------------------------------------------------------------------------------------------------------------------------------------------------------------------------------------------------------------------------------------------------------------------------------------------------------------------------------------------------------------------------------------------------------------------------------------------------------------------------------------------------------------------------------------------------------------------------------------------------------------------------------------------------------------------------------------------------------------------------------------------------------------------------------------------------------------------------------------------------------------------------|
|  | <p>X124283, DNAm -&gt; IMPAD1, DNAm -&gt; GJC1, RNA -&gt; BNIP1, Metabolite -&gt; X4292, Metabolite -&gt; X130463, Metabolite -&gt; DODECANOL, Metabolite -&gt; X91, Metabolite -&gt; X1873, Protein -&gt; Apolipoprotein A-I (Apo A-I), RNA -&gt; NAT8, Metabolite -&gt; X44509, DNAm -&gt; SEC14L2, Protein -&gt; Apolipoprotein E (Apo E), Metabolite -&gt; X1909, DNAm -&gt; MPL, RNA -&gt; EPB41L5, Protein -&gt; Calbindin (ng/ml), Metabolite -&gt; X47358, RNA -&gt; ANKUB1, DNAm -&gt; SDK1, DNAm -&gt; STEAP2, Protein -&gt; Platelet-Derived Growth Factor BB (PDGF), DNAm -&gt; PRDM16, RNA -&gt; GLIS2, DNAm -&gt; MANEAL, DNAm -&gt; CCDC54, Metabolite -&gt; X103390, Metabolite -&gt; X1872, DNAm -&gt; BEND2, Metabolite -&gt; GLUCONIC.ACID, RNA -&gt; DEFB106A    DEFB106B, Metabolite -&gt; X130465, Metabolite -&gt; X130461, Metabolite -&gt; X16788, RNA -&gt; COL10A1, RNA -&gt; ABI1, DNAm -&gt; TNFRSF8, DNAm -&gt; GRAMD1B, Metabolite -&gt; X1912, RNA -&gt; ZNF512B, Metabolite -&gt; LAURIC.ACID, Protein -&gt; Ferritin (FRTN), Metabolite -&gt; TOCOPHEROL.GAMMA., DNAm -&gt; KIAA1026, Metabolite -&gt; X25321, RNA -&gt; ANKRD44, Metabolite -&gt; GLYCERIC.ACID, Protein -&gt; Matrix Metalloproteinase-1 (MMP-1), Protein -&gt; E-Selectin (ng/mL), Metabolite -&gt; X1996, RNA -&gt; CCP110, RNA -&gt; GABRB3, Metabolite -&gt; X130479, Metabolite -&gt; X2430, Protein -&gt; Chemokine CC-4 (HCC-4), Metabolite -&gt; X3258, Metabolite -&gt; X494, Metabolite -&gt; SUCCINIC.ACID, Metabolite -&gt; X490, Metabolite -&gt; BETA.SITOSTEROL, Metabolite -&gt; METHIONINE.SULFOXIDE, DNAm -&gt; RTBDN, RNA -&gt; SLC6A11, Metabolite -&gt; X1.5.ANHYDROGLUCITOL, Metabolite -&gt; X4746, Metabolite -&gt; X130713, Metabolite -&gt; X3286, RNA -&gt; TOM1L2, RNA -&gt; KRT6C, Metabolite -&gt; X11523, Metabolite -&gt; SUCROSE, Metabolite -&gt; X130466, DNAm -&gt; C10orf88, Metabolite -&gt; XYLULOSE.NIST, RNA -&gt; LSAMP, Protein -&gt; Interleukin-8 (IL-8), Protein -&gt; Interleukin-6 (IL-6), Metabolite -&gt; EPSILON.CAPROLACTAM, Protein -&gt; Alpha-1-Antitrypsin (AAT), DNAm -&gt; LSR, Metabolite -&gt; TARTARIC.ACID, DNAm -&gt; WFIKKN2</p> |
|--|------------------------------------------------------------------------------------------------------------------------------------------------------------------------------------------------------------------------------------------------------------------------------------------------------------------------------------------------------------------------------------------------------------------------------------------------------------------------------------------------------------------------------------------------------------------------------------------------------------------------------------------------------------------------------------------------------------------------------------------------------------------------------------------------------------------------------------------------------------------------------------------------------------------------------------------------------------------------------------------------------------------------------------------------------------------------------------------------------------------------------------------------------------------------------------------------------------------------------------------------------------------------------------------------------------------------------------------------------------------------------------------------------------------------------------------------------------------------------------------------------------------------------------------------------------------------------------------------------------------------------------------------------------------------------------------------------------------------------------------------------------------------------------------------------------------------------------------------------------------------------------------------------------------------------------------------------------------------------------------------------------------------------------------------------------------------------------------------------------------------------------------------------------------------------------------------------|

\* Only markers with contribution over the 95 percentile are reported (in order of contribution).

**Table S3** | Differentially methylated and expressed genes in AD subtypes.

| Differentially expressed | DNA-Methylation                                                                                                                                                                                                                                                                                                                                                                                                                                                                                                                                                                                                                                   | RNA                                                                                                                                                                                                                                                                                                                                                                                                                                                                               |
|--------------------------|---------------------------------------------------------------------------------------------------------------------------------------------------------------------------------------------------------------------------------------------------------------------------------------------------------------------------------------------------------------------------------------------------------------------------------------------------------------------------------------------------------------------------------------------------------------------------------------------------------------------------------------------------|-----------------------------------------------------------------------------------------------------------------------------------------------------------------------------------------------------------------------------------------------------------------------------------------------------------------------------------------------------------------------------------------------------------------------------------------------------------------------------------|
| AD1-Brain (ROSMAP)       | <p><i>GREM2, LHX8, DUSP5P, GREM2, PCNXL2, LOC731275, FNBP1L, RGS4, C1orf106, SLAMF8, GREM2, GOLPH3L, CDC42SE1, MLLT11, NEGR1, ISG20L2, PIGK, S100A13, PUM1, S100A10, RPE65, C1orf14, ATP1A1, GOLPH3L, NADK, SNORA14B, TOMM20, PPM1J, FAM189B, TOMM40L, SYDE2, MXRA8, PADI3, C1orf194, KIAA1324, MOBKL2C, SYPL2, PODN, SFRS4, BCL2L15, SNHG12, SNORA44, SNORA16A, SNORA61, HDAC1, CNST, CASZ1, DISC1, TSNAX-DISC1, EPHA10, GREM2, IARS2, ERMAP, CCDC23, ERMAP, FMO5, DSTYK, RABIF, PLEKHA6, GREM2, FDPS, CTTNBP2NL, CNNM4, SPHKAP, DARS, CACNB4, RHBDD1, KLHL29, ABCB6, SNRNP27, SPATS2L, USP37, RQCD1, TUBA3D, BOLL, ZFP36L2, LASS6, LBH,</i></p> | <p><i>RERE, PPIL5, LOC440248, ITGA10, RBM17, HS.407028, CDIPT, ALG14, DCN, NFATC3, CTH, OTUD5, REC8, WDR6, HS.583475, SPAG9, MRTO4, ZNF706, DOCK6, HS.321580, ZNF627, AP4E1, FRAS1, LOC649783, GPER, TRIM5, QSOX2, HS.314177, GRTP1, HSPC111, RAB5C, MTMR3, CA2, CCRN4L, SEC22C, TAZ, TFDP1, TRIML2, KLHL35, GPER, NCALD, TMEM50A, PHF20L1, LRDD, POLR3F, FAM62C, NDUFA7, CALD1, LOC651621, H1F0, PSMD8, TLK2, ABCC10, ZC3HAV1L, ALKBH6, BCL2L1, LOC653717, PCID2, PRKDC,</i></p> |



|  |                                                                                                                                                                                                                                                                                                                                                                                                                                                                                                                                                                                                                                                                                                                                                                                                                                                                                                                                                                                                                                                                                                                                                                                                                                                                                                                                                                                                                                                                                                                                                                                                                                                                                                                                                                                                                                                                                                                                                                                                                                       |                                                                                                                                                                                                                                                                                                                                                                                                                                                                                                                                                                                                                                                                                                                                                                                                                                                                                                                                                                                                                                                                                                                                                                                                                                                                                                                                                                                                                                                                   |
|--|---------------------------------------------------------------------------------------------------------------------------------------------------------------------------------------------------------------------------------------------------------------------------------------------------------------------------------------------------------------------------------------------------------------------------------------------------------------------------------------------------------------------------------------------------------------------------------------------------------------------------------------------------------------------------------------------------------------------------------------------------------------------------------------------------------------------------------------------------------------------------------------------------------------------------------------------------------------------------------------------------------------------------------------------------------------------------------------------------------------------------------------------------------------------------------------------------------------------------------------------------------------------------------------------------------------------------------------------------------------------------------------------------------------------------------------------------------------------------------------------------------------------------------------------------------------------------------------------------------------------------------------------------------------------------------------------------------------------------------------------------------------------------------------------------------------------------------------------------------------------------------------------------------------------------------------------------------------------------------------------------------------------------------------|-------------------------------------------------------------------------------------------------------------------------------------------------------------------------------------------------------------------------------------------------------------------------------------------------------------------------------------------------------------------------------------------------------------------------------------------------------------------------------------------------------------------------------------------------------------------------------------------------------------------------------------------------------------------------------------------------------------------------------------------------------------------------------------------------------------------------------------------------------------------------------------------------------------------------------------------------------------------------------------------------------------------------------------------------------------------------------------------------------------------------------------------------------------------------------------------------------------------------------------------------------------------------------------------------------------------------------------------------------------------------------------------------------------------------------------------------------------------|
|  | <p><i>BOLL, BOLL, CNNM4, IMMT, TMEM131, DIS3L2, BOLL, KCTD18, RPS7, CYP27A1, SNORD53, WDR43, TMEM150A, BRE, MAP2, ATG16L1, ALS2CR8, WDR12, ALS2CR8, NCRNA00164, LRRFIP1, NMI, CNNM4, C2orf74, SLC9A2, KIF5C, MYT1L, C3orf55, WNT7A, MME, LIPH, NCEH1, C3orf55, COPG, WWTR1, GRM7, FNDC3B, SUMF1, C3orf72, GPX1, TEX264, GAP43, OSBPL11, NIT2, DOCK3, GLT8D1, RBP1, CCDC71, LRRC33, HTR3D, GPR160, EHHADH, SLC02A1, ACTR8, SYN2, NCK1, DNASE1L3, PAQR9, ACTL6A, HDAC11, G3BP2, UGT2A2, SEC24D, UBE2D3, RCHY1, DGKQ, TRIML1, MTNR1A, FAM190A, SHROOM3, SPOCK3, SH3TC1, PACRGL, INTU, ZNF718, AMTN, PPARGC1A, STK32B, PCDHGA4, KCTD16, C5orf42, RNU5E, SLC6A18, C5orf32, CTNND2, NDFIP1, PAPD4, RASGEF1C, SGCD, SLC1A3, P4HA2, CEP72, FER, MBLAC2, KCTD16, 3/3/2019, UTP15, EBF1, AMACR, FBXW11, PPAP2A, PCDHB12, PCDHGA2, C5orf39, CETN3, PCDHGA2, FAM134B, CEP72, HGC6.3, NRSN1, ZNRD1, DOPEY1, ZDHHC14, RIMS1, OOE, RIPK1, BMP6, KIAA1919, HLA-J, CD2AP, CMAH, GCNT2, TAPBP, RPP40, MTO1, COL11A2, ARID1B, C6orf10, DDAH2, SFRS18, USP49, TPBG, CDSN, GNLI, AKAP12, LY6G6F, PAPOLB, RADIL, LSM5, SLC26A5, 9/13/2019, PTPRN2, YWHAG, EXOC4, EPHA1, CDK6, ELMO1, STEAP4, ZNF498, FOXK1, BCAP29, MAGI2, OSBPL3, RBM33, STEAP4, PMS2L2, FAM20C, RADIL, ZNF680, STEAP4, SPATC1, ST18, MAL2, MSRA, SFRP1, GRHL2, BAI1, TSNARE1, CSMD1, MFHAS1, MTERFD1, XPO7, POP1, SFRP1, ADAM9, ADAM32, SFRP1, MCPH1, GRHL2, KIAA0196, ASAP1, YTHDF3, PLAG1, CSMD1, MTUS1, MTMR9, GRHL2, MYOM2, TRIM14, C5, SVEP1, DENND1A, INPP5E, ABCA2, TMCI, STX17, C10orf88, CPEB3, FRAT2, LOC100133308, ECD, COMTD1, VENTX, SLC16A9, TNKS2, ZMIZ1, DIP2C, DNA2, DPF2, ACTN3, LOC729799, KBTBD4, KCNQ1, BDNF, SLN, MACROD1, CHEK1, OR51S1, OPCML, METT5D1, CCDC34, PLEKHB1, TSG101, ARHGEF17, POLR2G, GLYATL1, ANO9, CAPN1, LEMD3, SCNN1A, PEBP1, HOXC4, KRAS, KCNA1, FRS2, APOLD1, ST8SIA1, ACSS3, RPLP0, CCNT1, POLR3B, ACAD10, TDG, ANO6, RAB5B, MYO1H, MPHOSPH9, MAPKAPK5, F7, C13orf27, KATNAL1, FARP1, C13orf16, CDK8, KL, COX8C, EML1, PRPF39, PSMC6,</i></p> | <p><i>ZNF235, CAB39L, PDIA3P, MXII, USP24, SERINC3, C11ORF88, ZMYND12, HS.458154, HS.581405, BBS2, STAG1, TRIM8, COL17A1, DHX40, MLL3, C19ORF10, PPAP2A, KIAA1147, ZNF518B, NPIP, ILI7RB, AXIN2, METT11D1, ALDH1A1, HS.539639, RANBP3L, BMII, TMEM203, ZMYND8, VPS25, PEX16, WDR77, GEM, FSCB, ACOX1, PRMT8, TRIM13, CYB5R1, SERPINB9, RERE, LOC645447, TBC1D8B, LYRM4, ACADVL, HS.255242, DNMT1, SETD2, LOC653764, ANXA11, POMT1, ZZZ3, TXNL2, LOC653210, ANKR2D3, MAPKBPI, SNUPN, RCC2, HS.389988, CD59, BBS2, FAM71E1, RAB3IP, DEFB119, NIN, GEM, CEP110, TRAPPC2L, ERBB2IP, LOC730534, ZNF197, RCN1, MCF2L2, MED25, TFPT, LRCH4, DUS2L, ADH1C, MANBAL, APTX, SLTM, NAT5, FLJ44815, FAM169B, PPT2, SMYD2, NIN, SLC38A2, HS.543015, LOC399888, SEC14L1, LOC23117, PEMT, PDE4DIP, SLC43A2, HS.434957, CCDC56, PHACTR4, CD151, LOC728734, HS.10862, HS.527103, HS.576530, ABL2, TUBB4Q, METTL1, LOC728888, LOC652875, ELL3, NCAPH2, ZNF598, ATG4B, EIF3A, EMX2, TIMM17B, ALDH8A1, C6ORF111, HS.547738, PASK, MT1E, DNAJC18, KRT13, LOC650494, GSTO2, GOLPH3, PNLI3, LOC153328, MGC27345, C15ORF38, TENC1, C17ORF61, PNOC, PHEX, CAB39L, LOC440356, KPNA5, PFKP, LOC441086, MEIS3, EGR3, ZCCHC17, SLC39A12, BBS4, ACP2, HSP90B1, HS.581313, PTPRE, GRK4, NUDT2, ITIH5, ABCA7, LOC158376, SLC43A3, PRNPIP, FAM139A, MYADM, HBA2, HS.555533, LOC440934, PRDM2, SCPEP1, KIF5B, LOC442597, ZCCHC14, NUDT2, ZNF26, ZCCHC8, PPP1CC, WDR64, PBX4, LOC728308, RFP,</i></p> |
|--|---------------------------------------------------------------------------------------------------------------------------------------------------------------------------------------------------------------------------------------------------------------------------------------------------------------------------------------------------------------------------------------------------------------------------------------------------------------------------------------------------------------------------------------------------------------------------------------------------------------------------------------------------------------------------------------------------------------------------------------------------------------------------------------------------------------------------------------------------------------------------------------------------------------------------------------------------------------------------------------------------------------------------------------------------------------------------------------------------------------------------------------------------------------------------------------------------------------------------------------------------------------------------------------------------------------------------------------------------------------------------------------------------------------------------------------------------------------------------------------------------------------------------------------------------------------------------------------------------------------------------------------------------------------------------------------------------------------------------------------------------------------------------------------------------------------------------------------------------------------------------------------------------------------------------------------------------------------------------------------------------------------------------------------|-------------------------------------------------------------------------------------------------------------------------------------------------------------------------------------------------------------------------------------------------------------------------------------------------------------------------------------------------------------------------------------------------------------------------------------------------------------------------------------------------------------------------------------------------------------------------------------------------------------------------------------------------------------------------------------------------------------------------------------------------------------------------------------------------------------------------------------------------------------------------------------------------------------------------------------------------------------------------------------------------------------------------------------------------------------------------------------------------------------------------------------------------------------------------------------------------------------------------------------------------------------------------------------------------------------------------------------------------------------------------------------------------------------------------------------------------------------------|

|  |                                                                                                                                                                                                                                                                                                                                                                                                                                                                                                                                                                                                                                                                                                                                                                                                                                                                                                                                                                                                                                                                                                |                                                                                                                                                                                                                                                                                                                                                                                                                                                                                                                                                                                                                                                                                                                                                                                                                                                                                                                                                                                                                                                                                                                                                                                                                                                                                                                                                                                                                                                                                                      |
|--|------------------------------------------------------------------------------------------------------------------------------------------------------------------------------------------------------------------------------------------------------------------------------------------------------------------------------------------------------------------------------------------------------------------------------------------------------------------------------------------------------------------------------------------------------------------------------------------------------------------------------------------------------------------------------------------------------------------------------------------------------------------------------------------------------------------------------------------------------------------------------------------------------------------------------------------------------------------------------------------------------------------------------------------------------------------------------------------------|------------------------------------------------------------------------------------------------------------------------------------------------------------------------------------------------------------------------------------------------------------------------------------------------------------------------------------------------------------------------------------------------------------------------------------------------------------------------------------------------------------------------------------------------------------------------------------------------------------------------------------------------------------------------------------------------------------------------------------------------------------------------------------------------------------------------------------------------------------------------------------------------------------------------------------------------------------------------------------------------------------------------------------------------------------------------------------------------------------------------------------------------------------------------------------------------------------------------------------------------------------------------------------------------------------------------------------------------------------------------------------------------------------------------------------------------------------------------------------------------------|
|  | <p><i>RDH11, ESRRB, YLPM1, GMPR2, MIR379, NGB, SRP54, FAM181A, SPATA7, BATF, KIAA1409, TC2N, TRPM1, FRMD5, TRPM7, MIR548H4, IGF1R, C15orf29, ATP10A, PLA2G4D, IQCH, SNORD115-13, LOC390594, FAM103A1, CHRNA7, SNORD116-14, PEX11A, ZNF609, PRRT2, CHP2, NRNL, HS3ST2, CRAMP1L, AFG3L1, UNKL, TXNDC11, RABEP2, DECR2, MGC23284, BAIAP3, RGS11, COX4NB, MTIF, LMF1, LOC283856, CDH1, KIAA0430, KIAA0182, PFN1, TBCD, GALK1, TBCD, MYO18A, KPNA2, ABR, C17orf89, TNS4, CENPV, PHB, CCDC144C, NXN, C1QTNF1, STXBP4, OSBPL7, GPRC5C, SPNS3, FAM27L, FOXK2, STARD3, TCF4, TNFRSF11A, TMX3, CPLX4, CTAGE1, ZNF397OS, MIR526B, NFIC, SBK2, CFD, CACNG7, TRIP10, PAFAH1B3, NAPSA, NAPSA, LMNB2, C19orf22, MIR519C, PDE4C, ZNF585B, SMARCA4, SIN3B, FZR1, PRKD2, ZNF266, PRR12, ATCAY, EPHX3, KLK9, REXO1, AKT1S1, SERTAD3, NAPSA, CCDC155, DUS3L, SHISA7, COMP, CCDC155, SIGLEC9, SIGLEC6, ZNF560, NAPSA, GIPC3, CD70, TOX2, ROMO1, CHRNA4, GNASAS, NAPB, C20orf20, BFSP1, KRTAP24-1, C21orf67, TTC3, SLC37A1, IFNGR2, SLC19A1, RABL4, UCRC, TNRC6B, CYTH4, KREMEN1, A4GALT, C22orf27, CDC42EP1</i></p> | <p><i>SAFB2, LOC23117, C19ORF48, PLAG1, HIST1H2BO, CYP11A1, NSMCE1, ZNF622, PHYHD1, NSUN5C, DDX3X, ESPL1, CBRI, PTPRF, PSMD5, HS.205112, KANK2, AKR1C4, GPER, SIL1, HS.536451, HS.561174, EMD, LOC644143, S100PBP, HPS4, GPR120, HS.490981, SPRYD3, CHN2, C21ORF114, DNHD1, LOC148915, PAN3, NCOA6, TMEM2, TIMM8A, HS.279208, PSD2, HS.194225, RP5-1022P6.2, PLAC8L1, LOC727927, LOC642450, KCNJ16, SPAG9, MBTPS1, SDSL, CCDC52, FLYWCHI, FNDC5, MUC20, CASC4, KCNK2, ADAD2, CHKB, HS.531457, MTG1, LOC441046, ARS2, NRIP2, HS.527535, TMEM97, TRAPPC1, ADD3, HS.391327, HS.418134, TDRD6, CLK1, CHCHD9, PPP2R3B, OR7A5, HBB, HS.576914, ANGPT2, NAP1L1, COL11A1, AXIN1, YARS, MRPS18A, COMMD9, FLJ20674, ATP6V0C, MMACHC, TAKR, EIF1, RASGRP2, EIF3C, LOC647941, C7ORF26, C16ORF90, SF3B1, SPHK2, HS.570308, PAXIP1, FRMPD2, C1ORF102, ZNF143, HS.298873, HS.554346, LOC646806, SLC26A6, TMCC2, TMEM14C, TYSND1, MANEAL, SNRP70, EIF2S1, LOC650887, FUT8, FOXD1, ARRDC2, CSPP1, YPEL4, PRR13, C9ORF78, UCKL1, OTUD4, TNFRSF25, S100A4, ELF1, MPI, LOC645681, PPFIBP1, PDCD2, LOC644334, LAMA5, MESP1, INSM1, POLR1E, FBXL22, OR2A14, HMG2, HS.559929, BRE, PHB2, ODC1, CHCHD8, HS.564803, PASK, LRRFIP2, DOM3Z, HSF4, LOC613037, SHPRH, KLC4, STARD7, HSD17B4, HS.550430, ST8SIA4, ILK, LST-3TM12, NAV2, CALD1, LRRC51, ATM, LOC650155, LOC388237, SCAPER, COIL, ZCCHC11, FLJ41481, NSDHL, ERCC2, MAX, NFKBIA, IVNS1ABP, FLJ45300, LOC283755, HS.538763, SLC44A1, ERBB2IP, PROCA1, SLC30A3,</i></p> |
|--|------------------------------------------------------------------------------------------------------------------------------------------------------------------------------------------------------------------------------------------------------------------------------------------------------------------------------------------------------------------------------------------------------------------------------------------------------------------------------------------------------------------------------------------------------------------------------------------------------------------------------------------------------------------------------------------------------------------------------------------------------------------------------------------------------------------------------------------------------------------------------------------------------------------------------------------------------------------------------------------------------------------------------------------------------------------------------------------------|------------------------------------------------------------------------------------------------------------------------------------------------------------------------------------------------------------------------------------------------------------------------------------------------------------------------------------------------------------------------------------------------------------------------------------------------------------------------------------------------------------------------------------------------------------------------------------------------------------------------------------------------------------------------------------------------------------------------------------------------------------------------------------------------------------------------------------------------------------------------------------------------------------------------------------------------------------------------------------------------------------------------------------------------------------------------------------------------------------------------------------------------------------------------------------------------------------------------------------------------------------------------------------------------------------------------------------------------------------------------------------------------------------------------------------------------------------------------------------------------------|

|  |                                                                                                                                                                                                                                                                                                                                                                                                                                                                                                                                                                                                                                                                                                                                                                                                                                                                                                                                                                                                                                                                                                                                                                                                                                                                                                                                                                                                                                                                                                             |
|--|-------------------------------------------------------------------------------------------------------------------------------------------------------------------------------------------------------------------------------------------------------------------------------------------------------------------------------------------------------------------------------------------------------------------------------------------------------------------------------------------------------------------------------------------------------------------------------------------------------------------------------------------------------------------------------------------------------------------------------------------------------------------------------------------------------------------------------------------------------------------------------------------------------------------------------------------------------------------------------------------------------------------------------------------------------------------------------------------------------------------------------------------------------------------------------------------------------------------------------------------------------------------------------------------------------------------------------------------------------------------------------------------------------------------------------------------------------------------------------------------------------------|
|  | <p><i>PPAP2A, FBXO2, EIF4E2, ZCCHC11, HS.149811, MDK, SLCO4A1, SIRT4, LEAP2, HS.560292, YIF1A, GOLGA8G, KCTD3, AGPAT1, SH3BGR, KCNF1, RBP4, HERC2P2, PIN1, MLLT6, B3GALTL, USP20, TEAD2, CCDC96, LAMA3, LOC646345, ATXN2L, ATP5J2, ZMYND8, CDK7, CIP29, ZNF649, HS.584170, CHI3L2, BGLAP, HS.512255, BCAS3, NXF1, GTF2IRD2B, HERC2P2, DDX39, C19ORF57, C19ORF30, LOC652264, LOC400214, GPR56, SIDT2, PMM1, ZCCHC7, TOP3B, LOC651125, CHKB, VAC14, OXSRI, C21ORF33, NUP160, SLC25A18, FDX1L, SFRS14, LRDD, C1ORF76, TMEM141, PDE3B, CTCF, BCKDK, C14ORF148, TXNL4B, ATG7, MAPK10, PRAF2, HMGCSI, DIP2A, PDE5A, S100A4, WDR59, IFP38, CAPNS1, LOC652168, HS.483906, MRPS12, LOC644267, LHX6, TMEM26, CYP4Z1, PPP2R3B, SASH1, PPEF1, MYOC, HS.547286, NXF1, BDH1, SEZ6L2, GPR56, CCDC43, LDLRAD1, ATOX1, COL5A3, TNS3, SFRS17A, ELOVL6, SYT16, FAM171A1, TTC31, SPIRE1, FARS2, HS.403452, HADHA, HS.443602, WDR90, PRMT5, LARP7, ZNF409, C1ORF123, C17ORF44, COMMD5, CDK10, HS.574778, ATPAF1, PHYH, FAM160A2, KRT5, LOC400464, FLJ27354, HS.292873, IMMP2L, TRAPPC9, KIAA0913, STAU1, HS.209244, LOC728689, HMGB2, HERC2P2, LOC653543, CCDC32, PDGFRB, TRMT5, C10ORF39, SEPHS1, PTK2B, C1ORF97, GINS2, CDC14B, LOC647859, TRAPPC2, VPS54, HS.532239, RPL13, NUP155, FLJ22222, C6ORF134, HS.105791, SLC7A14, LOC342979, ENO3, ZNF334, ARMC2, VAV3, PRPSAP1, GDI2, PEF1, LOC653066, FZD9, LPIN1, ANKFY1, SLC6A12, SASH1, THIL, TSR2, CCNO, LOC646144, DYRK4, NPPA, GPSM1, HPS4, NWD1, C21ORF66, ABCC12,</i></p> |
|--|-------------------------------------------------------------------------------------------------------------------------------------------------------------------------------------------------------------------------------------------------------------------------------------------------------------------------------------------------------------------------------------------------------------------------------------------------------------------------------------------------------------------------------------------------------------------------------------------------------------------------------------------------------------------------------------------------------------------------------------------------------------------------------------------------------------------------------------------------------------------------------------------------------------------------------------------------------------------------------------------------------------------------------------------------------------------------------------------------------------------------------------------------------------------------------------------------------------------------------------------------------------------------------------------------------------------------------------------------------------------------------------------------------------------------------------------------------------------------------------------------------------|

|                    |                                                                                                                                                                                                                                                                                                                                                                                                                                      |                                                                                                                                                                                                                                                                                                                                                                                                                                                                                                                                                                                                                                                                                                                                                                                                                                                                                                                                                                                                                                                                                                                                                           |
|--------------------|--------------------------------------------------------------------------------------------------------------------------------------------------------------------------------------------------------------------------------------------------------------------------------------------------------------------------------------------------------------------------------------------------------------------------------------|-----------------------------------------------------------------------------------------------------------------------------------------------------------------------------------------------------------------------------------------------------------------------------------------------------------------------------------------------------------------------------------------------------------------------------------------------------------------------------------------------------------------------------------------------------------------------------------------------------------------------------------------------------------------------------------------------------------------------------------------------------------------------------------------------------------------------------------------------------------------------------------------------------------------------------------------------------------------------------------------------------------------------------------------------------------------------------------------------------------------------------------------------------------|
|                    |                                                                                                                                                                                                                                                                                                                                                                                                                                      | <p><i>USP4, HECW2, TMEM107, MAP2K5, SNAI2, ARL9, FAM122A, C1ORF50, RPL10A, TUFM, MRPL37, C3ORF63, MEIS3, FXYD7, TAF1C, EFCAB5, C6ORF148, MRPS6, MAP4K2, KCNMB3, C21ORF34, MAST1, STK36, RSP02, UBL5, ASPHD1, LRRC16, LSS, CCDC13, DDOST, HS.104774, RANBP3L, MGMT, NBPFI, GALNT13, SR140, HS.434108, WDR19, ALDH1A1, IFNAR2, LOC649679, LYRM1, IMP4, HS.184721, SLC15A2, HS.543232, XPC, THAP11, FIBP, ATP5J2, HBA2, CCDC44, PRELP, KIF5A, PRKCG, KIAA0090, MRPL17, WDR51A, EXT2, LOC144678, IPO11, ETFB, TPPP3, CREBBP, PAWR, TRAPPC6A, STMN4, DUSP1, BTBD6, QDPR, CC2D2A, MRAS, HS.278817, C16ORF58, NF1, JTV1, PITPNM1, FLJ46230, CIAO1, LOC388681, ANKFY1, OR5D18, HS.529514, LOC391692, GTPBP8, PRELP, HS.120938, TRAF5, LOC731042, POLR3K, HIGD1B, PFKFB2, ST3GAL3, SDCCAG3, CGREF1, FLJ39061, TMSB4X, SAFB2, SOCS4, C11ORF48, PRPF4B, RASEF, C11ORF61, SYN3, PHF17, SLC4A11, ATP6V0B, FRAS1, HS.582496, SFRS4, APLN, ASCL2, HS.525400, HS.580702, NPIP, CXCR4, DSCR3, EXOC6, PPM1B, OSBPL9, LOC647371, KLKB1, IDUA, USP42, LOC651029, HS.570762, ADORA2A, 3/7/2018, ZNF442, SSR4, SRRM2, PPFIA1, ZNF706, HS.542571, LOC642980, FNBP4, ELA2</i></p> |
| AD2-Brain (ROSMAP) | <p><i>LHX8, DUSP5P, PCNXL2, LOC731275, KIF26B, FNBP1L, RGS4, SLAMF8, GOLPH3L, FAM41C, TCEA3, PIGK, S100A13, PUM1, S100A10, GPR137B, ATP1A1, ST6GALNAC3, SNORA14B, PPM1J, FAM189B, PARK7, C1orf103, MOBKL2C, SYPL2, PODN, BCL2L15, SNHG12, HDAC1, CNST, MSH4, CAMTA1, DISC1, TRIM46, GNB1, ATP2B4, FMO5, KCNN3, RABIF, CSMD2, FDPS, CNNM4, SPHKAP, DARS, CACNB4, RHBDD1, KLHL29, SLC16A14, SPATS2L, TUBA3D, BOLL, LASS6, LBH,</i></p> | <p><i>SDS, PPIL5, LOC440248, ITGA10, RBM17, C1ORF124, CDIPT, ALG14, DCN, NFATC3, LOC642521, CTH, OTUD5, MED29, REC8, CIB3, ARHGAP9, HS.583475, CDCA5, SPAG9, MRTO4, ZNF142, DOCK6, MID11P1, AK3L1, HS.321580, HS.537776, ZNF627, GABBR1, AP4E1, LOC649783, GPER, TRIM5, GRTP1, FRMPD2, BRD7, TUBGCP5, TRIP10, CHCHD6,</i></p>                                                                                                                                                                                                                                                                                                                                                                                                                                                                                                                                                                                                                                                                                                                                                                                                                             |

|                                                                                                                                                                                                                                                                                                                                                                                                                                                                                                                                                                                                                                                                                                                                                                                                                                                                                                                                                                                                                                                                                                                                                                                                                                                                                                                                                                                                                                                                                                                                                                                                                                                                                                                                                                                                                                                                                                                                                                                                          |                                                                                                                                                                                                                                                                                                                                                                                                                                                                                                                                                                                                                                                                                                                                                                                                                                                                                                                                                                                                                                                                                                                                                                                                                                                                                                                                                                                                                                                                                        |
|----------------------------------------------------------------------------------------------------------------------------------------------------------------------------------------------------------------------------------------------------------------------------------------------------------------------------------------------------------------------------------------------------------------------------------------------------------------------------------------------------------------------------------------------------------------------------------------------------------------------------------------------------------------------------------------------------------------------------------------------------------------------------------------------------------------------------------------------------------------------------------------------------------------------------------------------------------------------------------------------------------------------------------------------------------------------------------------------------------------------------------------------------------------------------------------------------------------------------------------------------------------------------------------------------------------------------------------------------------------------------------------------------------------------------------------------------------------------------------------------------------------------------------------------------------------------------------------------------------------------------------------------------------------------------------------------------------------------------------------------------------------------------------------------------------------------------------------------------------------------------------------------------------------------------------------------------------------------------------------------------------|----------------------------------------------------------------------------------------------------------------------------------------------------------------------------------------------------------------------------------------------------------------------------------------------------------------------------------------------------------------------------------------------------------------------------------------------------------------------------------------------------------------------------------------------------------------------------------------------------------------------------------------------------------------------------------------------------------------------------------------------------------------------------------------------------------------------------------------------------------------------------------------------------------------------------------------------------------------------------------------------------------------------------------------------------------------------------------------------------------------------------------------------------------------------------------------------------------------------------------------------------------------------------------------------------------------------------------------------------------------------------------------------------------------------------------------------------------------------------------------|
| <p>SRD5A2, BOLL, LOC100133985, LOC100302652, PAX3, BOLL, MYT1L, IL1F7, GREB1, CNNM4, EVX2, NFE2L2, IMMT, ZC3H6, TMEM131, DIS3L2, EPCAM, BOLL, KCTD18, NCK2, CYP27A1, SNORD53, TMEM150A, HAT1, ACTR2, MAP2, UXS1, DNAJC27, UBR3, RBM44, NCRNA00164, CNNM4, GIGYF2, CYP27C1, C2orf74, SLC9A2, KIF5C, C2orf42, C3orf55, MME, TRH, LIPH, NCEH1, C3orf55, GPR160, WWTR1, MYLK, RNF7, ROPN1, ST3GAL6, FNDC3B, CHST2, USP13, SUMF1, C3orf72, GPX1, C3orf10, TEX264, GAP43, OSBPL11, PFN2, GLT8D1, P4HTM, RBP1, HTR3D, GPR160, EHHADH, SLCO2A1, C3orf26, ACTR8, NCK1, DOCK3, DNASE1L3, PAQR9, G3BP2, SEC24D, UBE2D3, RCHY1, DGKQ, ARHGAP10, AFAP1, PDLIM5, SHROOM3, SPOCK3, SH3TC1, CCDC109B, EPHA5, ZNF876P, PDE6B, HSPA4L, FRAS1, PACRGL, TBC1D1, NFXL1, TBCK, ZNF718, AMTN, PPARGC1A, GRK4, STK32B, C4orf44, PCDHGA4, G3BP1, KCTD16, PRDM6, C5orf42, RNU5E, SLC6A18, C5orf32, TRIM23, SPRY4, PDZD2, FBXW11, MAML1, MCTP1, NDFIP1, RASGEF1C, SGCD, EBF1, P4HA2, UNC5A, CEP72, NDUFS4, NHP2, HMMR, MBLAC2, KCTD16, 3/3/2019, PPIC, AMACR, PPAP2A, FAM172A, C5orf39, PCDHGA4, PCDHGA2, FAM134B, BPHL, ZNRD1, HLA-DOA, TCF19, DOPEY1, ZDHHC14, ORC3L, RIMS1, KAAG1, RIPK1, KIAA1919, RPP21, LOC285740, SLC35A1, TNXB, CD2AP, RPP40, MTO1, COL11A2, ARID1B, FLOT1, C6orf10, TAP2, GNLI, DCDC2, MIR548H3, AKAP12, PPP1R10, PAPOLB, PAPOLB, SLC26A5, RADIL, C7orf64, PAPOLB, 9/13/2019, FEZF1, YWHAG, EXOC4, EPHA1, CDK6, ELMO1, PAPOLB, IQCE, BCAP29, MAGI2, OSBPL3, RADIL, CNOT4, STEAP4, SPATC1, WDR67, ST18, SFRP1, LYPLA1, GRHL2, TSNARE1, CSMD1, ZFP41, MFHAS1, MTERFD1, XPO7, POPI, SFRP1, ADAM9, ADAM32, SFRP1, PDGFRL, KLF10, PPP2R2A, ASAP1, C8orf34, YTHDF3, PLAG1, MYOM2, RNF139, TRIM14, C5, SVEP1, ORIQ1, NFIL3, ABCA2, TMC1, STX17, TOMM5, WDR37, ARMC4, CISD1, GOT1, CPEB3, RPS24, C10orf12, HIF1AN, LOC100133308, ECD, C10orf26, C10orf11, VENTX, SLC16A9, TNKS2, LOC283050, DNA2, KCNMA1, RTKN2, BSCL2, LDHA, HSPA8, PRDX5, FOLR1, KCNQ1, BDNF, OR8U8, CHEK1, METT5D1, CADM1, PLEKHBI, TSG101,</p> | <p>MTMR3, GOLT1A, INO80B, CA2, CCRN4L, SSX6, SEC22C, ZIC2, TFDPI, KLHL35, ISYNA1, GPER, NCALD, HS.558072, LRDD, FAM62C, MED12, NDUFA7, CALD1, LOC651621, H1F0, PSMD8, SUNC1, ABCC10, ZC3HAVIL, ALKBH6, ARL6IP6, BCL2L1, LOC653717, PCID2, PRKDC, ZNF235, LOC338799, CAB39L, PDIA3P, MXII, USP24, SERINC3, C11ORF88, ZMYND12, HS.581405, BBS2, STAG1, TRIM8, PVRL1, COL17A1, DBI, MSX1, LOC652668, C19ORF10, PPAP2A, KIAA1147, ZNF518B, PLECI, IL17RB, AXIN2, ALDH1A1, RANBP3L, HS.572064, BMII, TMEM203, ZMYND8, VPS25, PEX16, WDR77, GEM, FSCB, ACOX1, PRMT8, SERPINB9, RERE, LOC645447, TBC1D8B, LYRM4, HS.255242, DNMT1, LOC653764, ANXA11, CXCR4, POMT1, ZZZ3, TXNL2, HIST1H2AH, ANKRD23, CLDN15, MAPKBP1, SNUPN, RCC2, HS.389988, FAM117A, CD59, BBS2, SH3RF1, FAM71E1, C11ORF76, PARN, GEM, LOC200810, CEP110, LOC648364, TRAPPC2L, ERBB2IP, LOC730534, ZNF197, HS.570486, MCF2L2, MED25, LRCH4, ADH1C, MANBAL, APTX, NAT5, FLJ44815, PCBP2, PPT2, LOC134541, SMYD2, NIN, SLC38A2, SEC14L1, MRP63, LOC23117, PDE4DIP, SLC43A2, HS.434957, CCDC56, PHACTR4, CD151, HS.10862, ZNF215, HS.527103, TUBB4Q, METTL1, NCAPH2, ATG4B, CLYBL, EMX2, ALDH8A1, C6ORF111, HS.545328, HS.547738, C14ORF151, MTIE, DNAJC18, LOC650494, MIB2, HS.543041, GSTO2, HS.562325, GOLPH3, PNLIPRP2, LOC153328, C15ORF38, PNOC, HS.145490, UBXD6, PHEX, CAB39L, KPNA5, HS.564153, PFKP, HOXC9, LOC441086, MEIS3, EGR3, ZCCHC17, SLC39A12, TNPO1, HS.561216, BBS4, ACP2, HSP90B1, LOC651403, CD2BP2,</p> |
|----------------------------------------------------------------------------------------------------------------------------------------------------------------------------------------------------------------------------------------------------------------------------------------------------------------------------------------------------------------------------------------------------------------------------------------------------------------------------------------------------------------------------------------------------------------------------------------------------------------------------------------------------------------------------------------------------------------------------------------------------------------------------------------------------------------------------------------------------------------------------------------------------------------------------------------------------------------------------------------------------------------------------------------------------------------------------------------------------------------------------------------------------------------------------------------------------------------------------------------------------------------------------------------------------------------------------------------------------------------------------------------------------------------------------------------------------------------------------------------------------------------------------------------------------------------------------------------------------------------------------------------------------------------------------------------------------------------------------------------------------------------------------------------------------------------------------------------------------------------------------------------------------------------------------------------------------------------------------------------------------------|----------------------------------------------------------------------------------------------------------------------------------------------------------------------------------------------------------------------------------------------------------------------------------------------------------------------------------------------------------------------------------------------------------------------------------------------------------------------------------------------------------------------------------------------------------------------------------------------------------------------------------------------------------------------------------------------------------------------------------------------------------------------------------------------------------------------------------------------------------------------------------------------------------------------------------------------------------------------------------------------------------------------------------------------------------------------------------------------------------------------------------------------------------------------------------------------------------------------------------------------------------------------------------------------------------------------------------------------------------------------------------------------------------------------------------------------------------------------------------------|

|  |                                                                                                                                                                                                                                                                                                                                                                                                                                                                                                                                                                                                                                                                                                                                                                                                                                                                                                                                                                                                                                                                                                                                                                                                                                                                                                                                                                      |                                                                                                                                                                                                                                                                                                                                                                                                                                                                                                                                                                                                                                                                                                                                                                                                                                                                                                                                                                                                                                                                                                                                                                                                                                                                                                                                                                                                                                                                                                              |
|--|----------------------------------------------------------------------------------------------------------------------------------------------------------------------------------------------------------------------------------------------------------------------------------------------------------------------------------------------------------------------------------------------------------------------------------------------------------------------------------------------------------------------------------------------------------------------------------------------------------------------------------------------------------------------------------------------------------------------------------------------------------------------------------------------------------------------------------------------------------------------------------------------------------------------------------------------------------------------------------------------------------------------------------------------------------------------------------------------------------------------------------------------------------------------------------------------------------------------------------------------------------------------------------------------------------------------------------------------------------------------|--------------------------------------------------------------------------------------------------------------------------------------------------------------------------------------------------------------------------------------------------------------------------------------------------------------------------------------------------------------------------------------------------------------------------------------------------------------------------------------------------------------------------------------------------------------------------------------------------------------------------------------------------------------------------------------------------------------------------------------------------------------------------------------------------------------------------------------------------------------------------------------------------------------------------------------------------------------------------------------------------------------------------------------------------------------------------------------------------------------------------------------------------------------------------------------------------------------------------------------------------------------------------------------------------------------------------------------------------------------------------------------------------------------------------------------------------------------------------------------------------------------|
|  | <p>SART1, GLYATL1, LGALS12, ARHGEF12, CAPN1, LEMD3, SCNN1A, LOC338758, HOXC4, SLC2A13, KCNMB4, KRAS, KCNA1, FRS2, APOLD1, KCTD10, ACSS3, ZNF384, USP44, PPP1CC, MARS, CHFR, TDG, ANO6, MYO1H, RCBTB2, C13orf27, USPL1, N4BP2L1, TPT1, KATNAL1, ESD, FAM155A, CDK8, COX8C, STON2, RAD51L1, PRPF39, PSMC6, RDH11, ESRRB, GMPR2, EXOC5, PLEKHH1, SRP54, C14orf129, FAM181A, MPP5, SPATA7, BATF, KIAA1409, TC2N, PAQR5, TTLL13, FRMD5, C15orf29, TTC23, MIR548H4, IGF1R, C15orf29, UNC45A, LYSDM2, AKAP13, PLA2G4D, IQCH, SNORD115-13, LOC390594, C15orf29, ZNF609, RAB27A, AEN, PSMD7, KARS, NRN1L, HS3ST2, TXNDC11, UBE2I, KIF22, RGS11, MT1F, DDX19B, TMC07, LOC283856, CDH1, KIAA0430, SLC12A4, PFN1, TBCD, WRAP53, TBCD, KPNA2, ABR, TNS4, ZPBP2, FBF1, UNK, MARCH10, NXN, C1QTNF1, BRIP1, KRT36, STXBP4, SPNS3, FAM27L, FOXK2, C17orf70, MTVR2, ICT1, KRTAP4-3, PSMG2, SERPINB12, TNFRSF11A, TMX3, CPLX4, RPL17, HMSD, C18orf32, ZNF397OS, RNF165, NFIC, TRIP10, CACNG7, MORG1, RCN3, CEACAM18, PAFAH1B3, TRIP10, NAPSA, LMNB2, ZNF546, C19orf22, ZNF585B, SIN3B, PRR12, FZRI, ALKBH6, ZNF266, SIGLEC6, ATCAY, EPHX3, GGN, SERTAD3, NAPSA, CCDC155, DUS3L, CCDC155, SIGLEC9, SIPA1L3, NAPSA, TOX2, TP53INP2, PIGT, ROMO1, SLC2A4RG, ADRM1, C20orf20, NAPB, CHMP4B, TTC3, PIGP, UBASH3A, SLC19A1, RABL4, HDAC10, MKL1, TNRC6B, CYTH4, KREMEN1, A4GALT, CDC42EP1</p> | <p>HS.577965, NUDT2, TMEM43, MPP2, ABCA7, TBX6, LOC158376, SOX21, NAV2, SLC43A3, HBA2, NR1I2, ITGB5, LOC399715, LAG3, LOC440934, PRDM2, KIF5B, LOC442597, ZCCHC14, NUDT2, ZNF26, PPP1CC, WDR64, NOLA2, HS.72367, RBM12, TRIM4, SAFB2, LOC23117, C19ORF48, PLAG1, CYP11A1, NSMCE1, UHRF1, HS.213541, ZNF622, PHYHD1, DDX3X, ESPL1, LOC646424, ZNF746, PTPRF, THOC5, HS.205112, KANK2, AKR1C4, GPER, RFC2, EIF2B2, HS.536451, KIAA2010, HS.561174, EMD, ASCC3L1, GPR120, HS.490981, SPRYD3, ARFGAP2, DDIT4, CHN2, C17ORF76, DNHD1, BMPRIA, PRKCH, LOC148915, NCOA6, TMEM2, TIMM8A, HS.279208, PSD2, HS.194225, RP5-1022P6.2, KCNJ16, SPAG9, SDSL, PLEKHM2, CCDC52, FNDC5, KCNK2, ADAD2, CHKB, HS.531457, MTG1, ARS2, NRIP2, HS.527535, TMEM97, TRAPPC1, C5ORF15, DEFB127, ADD3, TDRD6, CLK1, CHCHD9, RHOJ, PPP2R3B, OR7A5, HBB, HS.576914, ANGPT2, NAP1L1, COL11A1, AXINI, YARS, MRPS18A, CHUK, COMMD9, FLJ20674, ATP6V0C, MMACHC, CSDE1, EIF1, EIF3C, C7ORF26, GAL3ST3, C16ORF90, FAM174B, XPO4, FLJ22639, GNA13, HS.570308, FRMPD2, ZNF143, PGA3, HS.298873, LOC646806, SLC26A6, TMCC2, TMEM14C, CYTL1, EIF2S1, JOSD3, FUT8, FOXD1, ARRD2, CSPPI, YPEL4, PRR13, C9ORF78, UCKL1, CLCNKA, IRAK2, LOC647096, S100A4, MTHFR, AFF1, ELF1, MPI, LOC645681, PDCD2, LOC644334, INSM1, POLR1E, FBXL22, A2ML1, HMGN2, PRG-3, BRE, PHB2, ODC1, HS.564803, KLHDC4, LOC613037, SHPRH, KLC4, AQP11, STARD7, HSD17B4, HS.550430, ILK, NAV2, CALD1, PDK2, LRRC51, ATM, SCAPER, COIL, ZCCHC11, NSDHL, ERCC2, MAX, NFKBIA,</p> |
|--|----------------------------------------------------------------------------------------------------------------------------------------------------------------------------------------------------------------------------------------------------------------------------------------------------------------------------------------------------------------------------------------------------------------------------------------------------------------------------------------------------------------------------------------------------------------------------------------------------------------------------------------------------------------------------------------------------------------------------------------------------------------------------------------------------------------------------------------------------------------------------------------------------------------------------------------------------------------------------------------------------------------------------------------------------------------------------------------------------------------------------------------------------------------------------------------------------------------------------------------------------------------------------------------------------------------------------------------------------------------------|--------------------------------------------------------------------------------------------------------------------------------------------------------------------------------------------------------------------------------------------------------------------------------------------------------------------------------------------------------------------------------------------------------------------------------------------------------------------------------------------------------------------------------------------------------------------------------------------------------------------------------------------------------------------------------------------------------------------------------------------------------------------------------------------------------------------------------------------------------------------------------------------------------------------------------------------------------------------------------------------------------------------------------------------------------------------------------------------------------------------------------------------------------------------------------------------------------------------------------------------------------------------------------------------------------------------------------------------------------------------------------------------------------------------------------------------------------------------------------------------------------------|

|  |                                                                                                                                                                                                                                                                                                                                                                                                                                                                                                                                                                                                                                                                                                                                                                                                                                                                                                                                                                                                                                                                                                                                                                                                                                                                                                                                                                                                                                                                                         |
|--|-----------------------------------------------------------------------------------------------------------------------------------------------------------------------------------------------------------------------------------------------------------------------------------------------------------------------------------------------------------------------------------------------------------------------------------------------------------------------------------------------------------------------------------------------------------------------------------------------------------------------------------------------------------------------------------------------------------------------------------------------------------------------------------------------------------------------------------------------------------------------------------------------------------------------------------------------------------------------------------------------------------------------------------------------------------------------------------------------------------------------------------------------------------------------------------------------------------------------------------------------------------------------------------------------------------------------------------------------------------------------------------------------------------------------------------------------------------------------------------------|
|  | <p><i>IVNSIABP, FLJ45300, LOC283755, ACOT7, SLC44A1, ERBB2IP, KIF5A, PROCA1, SLC30A3, PPAP2A, FBXO2, RAB7L1, EIF4E2, ZCCHC11, HS.149811, MDK, SLCO4A1, SIRT4, LEAP2, KCTD3, ICAM5, AGPAT1, SH3BGR, KCNFI, RBP4, HERC2P2, AK3LI, PINI, MLLT6, CD302, B3GALT1, WWOX, USP20, TEAD2, LOC646345, HS.539118, ATXN2L, ATP5J2, ZMYND8, CDK7, C9ORF100, C10ORF141, LRP8, ZNF484, HS.584170, CHI3L2, BGLAP, ASCL1, GTF2IRD2, BCAS3, FYN, HERC2P2, DDX39, C19ORF57, C19ORF30, LOC652264, LOC400214, GPR56, SIDT2, PMM1, PRTG, TOR1AIP2, TOP3B, VAC14, C21ORF33, NUP160, SLC25A18, LBR, FDXIL, SFRS14, GAS2L1, LRDD, C1ORF76, TMEM141, MSX2P1, PDE3B, TCEB3B, CTCF, BCKDK, TXNL4B, ATG7, MAPK10, UBE2D2, SOCS3, PRAF2, HMGCS1, DIP2A, HS.518794, S100A4, WDR59, HS.483906, MRPS12, TUBA1A, LOC650557, LHX6, LOC116236, TMEM26, AKAP7, PPP2R3B, FAM59B, SASH1, PPEF1, BDHI, SEZ6L2, GPR56, LOC391767, TAS2R10, ATOX1, STARD10, COL5A3, TNS3, ELOVL6, SYT16, PEPD, TOPORS, FAM171A1, TTC31, SPIRE1, FARS2, HADHA, HS.443602, CRTAP, LARP7, ZNF409, C1ORF123, C17ORF44, COMMD5, CDK10, HS.574778, FGF18, ATPAF1, PHYH, FAM160A2, KRT5, LOC400464, FLJ27354, HS.292873, IMMP2L, TRAPPC9, KIAA0913, STAU1, HS.284464, HS.209244, HERC2P2, LOC653543, GLOD4, CCDC32, PDGFRB, TRMT5, NTAN1, SEPHS1, SARS, SPECC1L, SMTN, HS.218036, GINS2, CDC14B, NDUFA10, LOC149448, LOC647859, TRAPPC2, VPS54, MAPK11, FLJ22222, C6ORF134, SLC7A14, FRMPD2L2, LOC342979, ENO3, LOC644808, ZNF334, POLR3C, VAV3,</i></p> |
|--|-----------------------------------------------------------------------------------------------------------------------------------------------------------------------------------------------------------------------------------------------------------------------------------------------------------------------------------------------------------------------------------------------------------------------------------------------------------------------------------------------------------------------------------------------------------------------------------------------------------------------------------------------------------------------------------------------------------------------------------------------------------------------------------------------------------------------------------------------------------------------------------------------------------------------------------------------------------------------------------------------------------------------------------------------------------------------------------------------------------------------------------------------------------------------------------------------------------------------------------------------------------------------------------------------------------------------------------------------------------------------------------------------------------------------------------------------------------------------------------------|

|                                  |                                                                                                                                                                                                                                                                                               |                                                                                                                                                                                                                                                                                                                                                                                                                                                                                                                                                                                                                                                                                                                                                                                                                                                                                                                                                                                                                                                                                                                                                                                                                                         |
|----------------------------------|-----------------------------------------------------------------------------------------------------------------------------------------------------------------------------------------------------------------------------------------------------------------------------------------------|-----------------------------------------------------------------------------------------------------------------------------------------------------------------------------------------------------------------------------------------------------------------------------------------------------------------------------------------------------------------------------------------------------------------------------------------------------------------------------------------------------------------------------------------------------------------------------------------------------------------------------------------------------------------------------------------------------------------------------------------------------------------------------------------------------------------------------------------------------------------------------------------------------------------------------------------------------------------------------------------------------------------------------------------------------------------------------------------------------------------------------------------------------------------------------------------------------------------------------------------|
|                                  |                                                                                                                                                                                                                                                                                               | <p><i>PRPSAP1, OTUB1, GDI2, LOC653066, FZD9, LPIN1, ANKFY1, SLC6A12, POGK, SASH1, TH1L, HECTD2, TSR2, CCNO, DYRK4, NPPA, GPSM1, HPS4, NWD1, C21ORF66, ABCC12, SERPINF1, USP4, TMEM107, ITPR2, OVOL2, OGFOD1, MAP2K5, SNAI2, ARL9, TUFM, MRPL37, CSRP1, C3ORF63, MEIS3, TAF1C, EFCAB5, HS.160027, STX12, OR2F1, C6ORF148, MRPS6, MAP4K2, KCNMB3, STK36, RSPO2, UBL5, FGF22, LRRC16, LSS, CCDC13, DDOST, HS.104774, POLR1E, RANBP3L, MGMT, GALNT13, HS.434108, LOC730455, ALDH1A1, LOC649679, LYRM1, IMP4, HS.184721, SLC15A2, XPC, HSPB3, UBAC2, ARD1A, NDUFC2, FIBP, ATP5J2, SCRIB, HS.570326, C10ORF61, HBA2, CCDC44, PRELP, KIF5A, PRKCG, KIAA0090, MRPL17, OR51G1, EXT2, LOC144678, CHP, RNF10, ASMTL, PAWR, STMN4, DUSP1, BTBD6, QDPR, CC2D2A, MRAS, HS.278817, C16ORF58, JTV1, PITPNM1, FLJ46230, CIAO1, MTMR15, OR5D18, HS.529514, LOC391692, PRELP, HS.120938, POLR3K, HIGD1B, PFKFB2, ST3GAL3, BRUNOL6, PLOD2, SDCCAG3, CGREF1, PRPF19, TMSB4X, SAFB2, SOCS4, PRPF4B, RASEF, SYN3, PHF17, SLC4A11, TPD52L1, ATP6V0B, AGRP, AGFG2, HS.583388, HS.582496, SFRS4, APLN, HS.525400, CXCR4, HNRPA1L-2, DSCR3, DKFZP586H2123, EXOC6, POLDIP3, ADNP2, KLKBI, NFKBI, ATP6V0B, ADORA2A, 3/7/2018, SSR4, HS.567677, C1ORF66, ELA2</i></p> |
| <p><b>AD3-Brain (ROSMAP)</b></p> | <p><i>DPH2, DUSP5P, PCNXL2, KIF26B, FNBP1L, PRKAB2, GREM2, GOLPH3L, CDC42SE1, CLSTN1, NEGRI, FAM41C, PIGK, S100A13, PUM1, RPE65, GPR137B, GOLPH3L, JAK1, NADK, FAM189B, SYDE2, CAMTA1, C1orf103, MOBKL2C, PODN, SFRS4, HDAC1, CASZI, DIRAS3, CASP9, DISC1, GREM2, GNB1, IARS2, ERMAP,</i></p> | <p><i>RERE, SDS, PPIL5, LOC440248, ITGA10, RBM17, ARPC5, C1ORF124, DCN, NFATC3, CTH, SDCCAG3, MED29, REC8, WDR6, ARHGAP9, PARD6G, HS.583475, SPAG9, MRTO4, ZNF142, ZNF706, MID1IP1, AK3LI, HS.321580, HS.537776, ZNF627,</i></p>                                                                                                                                                                                                                                                                                                                                                                                                                                                                                                                                                                                                                                                                                                                                                                                                                                                                                                                                                                                                        |



|  |                                                                                                                                                                                                                                                                                                                                                                                                                                                                                                                                                                                                                                                                                                                                                                                                                                                                                                                                                                                                                                                                                                                                                                                                                                                                                                                                                                                                                                                                                                                                                                                                                                                                                                                                                                                                                                                                                                                                                                                                            |                                                                                                                                                                                                                                                                                                                                                                                                                                                                                                                                                                                                                                                                                                                                                                                                                                                                                                                                                                                                                                                                                                                                                                                                                                                                                                                                                                                                                                                                                                                                             |
|--|------------------------------------------------------------------------------------------------------------------------------------------------------------------------------------------------------------------------------------------------------------------------------------------------------------------------------------------------------------------------------------------------------------------------------------------------------------------------------------------------------------------------------------------------------------------------------------------------------------------------------------------------------------------------------------------------------------------------------------------------------------------------------------------------------------------------------------------------------------------------------------------------------------------------------------------------------------------------------------------------------------------------------------------------------------------------------------------------------------------------------------------------------------------------------------------------------------------------------------------------------------------------------------------------------------------------------------------------------------------------------------------------------------------------------------------------------------------------------------------------------------------------------------------------------------------------------------------------------------------------------------------------------------------------------------------------------------------------------------------------------------------------------------------------------------------------------------------------------------------------------------------------------------------------------------------------------------------------------------------------------------|---------------------------------------------------------------------------------------------------------------------------------------------------------------------------------------------------------------------------------------------------------------------------------------------------------------------------------------------------------------------------------------------------------------------------------------------------------------------------------------------------------------------------------------------------------------------------------------------------------------------------------------------------------------------------------------------------------------------------------------------------------------------------------------------------------------------------------------------------------------------------------------------------------------------------------------------------------------------------------------------------------------------------------------------------------------------------------------------------------------------------------------------------------------------------------------------------------------------------------------------------------------------------------------------------------------------------------------------------------------------------------------------------------------------------------------------------------------------------------------------------------------------------------------------|
|  | <p><i>FMO5, DSTYK, RABIF, CAMTA1, PLEKHA6, CSMD2, GNG12, DARS, CACNB4, KLHL29, SPATS2L, USP37, BOLL, ZFP36L2, SRD5A2, BOLL, LOC100302652, IWS1, BOLL, GREB1, CNNM4, EVX2, NFE2L2, ZC3H6, EPCAM, BOLL, RPS7, CYP27A1, SNORD53, TMEM150A, BRE, UXS1, EIF5B, ATG16L1, ALS2CR8, UBR3, RBM44, CNNM4, CYP27C1, C2orf74, SLC9A2, KIF5C, C3orf55, MME, TRH, LIPH, NCEH1, C3orf55, COPG, GPR160, WWTR1, GRM7, RNF7, FNDC3B, CHST2, USP13, GPX1, C3orf10, TEX264, GAP43, NIT2, DOCK3, WNT7A, P4HTM, CCDC71, LRRC33, EHHADH, EHHADH, C3orf26, USP13, DOCK3, DNASE1L3, ACTL6A, HDAC11, UGT2A2, PAQR3, SEC24D, ARHGAP10, AFAP1, TRIML1, MTNRIA, FAM190A, PDLIM5, SHROOM3, SPOCK3, CCDC109B, EPHA5, PET112L, PDE6B, HSPA4L, TBCK, ZNF718, AMTN, GRK4, STK32B, C4orf44, PCDHGA4, UBE2B, G3BP1, KCTD16, C5orf42, SLC6A18, EGFLAM, C5orf32, CTNND2, TRIM23, SPRY4, PDZD2, MAMLI, MCTP1, NDFIP1, RASGEF1C, SLC1A3, EBF1, NR2F1, NDUFS4, ZFP2, NHP2, FER, EFNA5, MBLAC2, PPIC, UTP15, FBXW11, PCDHGA2, PCDHGA4, ERGIC1, CETN3, FAM134B, CEP72, HLA-DOA, TCF19, DOPEY1, ZDHHC14, ORC3L, OOEP, BMP6, KIAA1919, RPP21, HLA-J, LOC285740, POM121L2, SLC35A1, CD2AP, CMAH, GCNT2, MTO1, DDAH2, COL11A2, ARID1B, FLOT1, C6orf10, TPBG, CDSN, GRM1, EHMT2, DCDC2, LY6G6F, LRRC1, PAPOLB, PAPOLB, SLC26A5, RADIL, LSM5, C7orf64, SLC26A5, PAPOLB, 9/13/2019, BUD31, ALKBH4, PTPRN2, EXOC4, PAPOLB, ZNF498, IQCE, FOXK1, BCAP29, OSBPL3, UBE3C, RBM33, STEAP4, PMS2L2, FAM20C, RADIL, ZNF680, CNOT4, SPATC1, WDR67, SFRP1, LYPLA1, CSMD1, ZFP41, MFHAS1, MTERFD1, XPO7, SLC45A4, SFRP1, ADAM32, SFRP1, BHLHE22, GRHL2, KIAA0196, PPP2R2A, ASAP1, C8orf34, ZMAT4, TRAPPC9, MTMR9, GRHL2, RNF139, NCALD, C5, SVEP1, DENND1A, OR1Q1, NFIL3, ARPC5L, TMEM8C, STX17, TOMM5, WDR37, LOC387646, C10orf88, CISD1, CPEB3, RPS24, FRAT2, C10orf12, HIF1AN, LOC100133308, ECD, C10orf26, C10orf11, PBLD, TNKS2, ZMIZ1, DIP2C, LOC283050, RTKN2, BSCL2, LDHA, DIXDC1, PRDX5, LOC729799, FOLR1, KCNQ1, SLN, MACROD1, OR51S1, DKFZp779M0652,</i></p> | <p><i>AP4E1, FRAS1, TRIM5, QSOX2, FRMPD2, BRD7, TRIP10, RAB5C, GOLT1A, CA2, CCRN4L, SSX6, SEC22C, LPIN2, KLHL35, GPER, NCALD, HS.558072, PHF20L1, FAM62C, NDUFA7, CALD1, LOC651621, H1F0, PSMD8, TLK2, ALKBH6, ARL6IP6, LOC653717, PCID2, ZNF235, LOC731950, LOC338799, CAB39L, PDIA3P, MXI1, USP24, SERINC3, ZMYND12, HS.581405, STAG1, HS.583637, TRIM8, COL17A1, DHX40, DBI, MSX1, LOC652668, MLL3, C19ORF10, PPAP2A, KIAA1147, ZNF518B, PLEC1, IL17RB, METT11D1, ALDH1A1, HS.539639, RANBP3L, HS.572064, BMII, ZMYND8, VPS25, PEX16, WDR77, GEM, ACOX1, PRMT8, TRIM13, CYB5R1, SERPINB9, RERE, LOC645447, TBC1D8B, HS.255242, DNMT1, LOC653764, ANXA11, CXCR4, POMT1, ZZZ3, TXNL2, LOC653210, CLDN15, MAPKBP1, SNUPN, RCC2, FAM117A, CD59, SH3RF1, FAM71E1, RAB31P, DEFB119, NIN, PARN, GEM, LOC200810, CEP110, TRAPPC2L, ERBB2IP, LOC730534, HS.570486, HS.539959, RCN1, MCF2L2, MED25, JOSDI, DUS2L, MANBAL, SLTM, NAT5, PCBP2, FAM169B, LOC134541, SMYD2, NIN, SLC38A2, HS.543015, LOC399888, SEC14L1, MRP63, PEMT, PDE4DIP, SLC43A2, HS.434957, CCDC56, TBX20, NRSN2, LOC728734, HS.10862, HS.527103, TUBB4Q, METTL1, LOC728888, LOC652875, ZNF598, ATG4B, EIF3A, C6ORF111, HS.545328, C14ORF151, PASK, DNAJC18, BRD9, HS.543041, GSTO2, HS.562325, GOLPH3, PNLIPRP2, LOC153328, C17ORF61, PNOG, UBXD6, CAB39L, LOC440356, KPNA5, HS.564153, PFKP, LOC441086, MEIS3, EGR3, SNORD56, SLC39A12, TNPO1, HS.561216, BBS4, ACP2, HSP90B1, CD2BP2, NUDT2, TMEM43, ITIH5, TBX6, LOC158376, TRIAP1, SLC43A3, PRNPIP, FAM139A, HBA2,</i></p> |
|--|------------------------------------------------------------------------------------------------------------------------------------------------------------------------------------------------------------------------------------------------------------------------------------------------------------------------------------------------------------------------------------------------------------------------------------------------------------------------------------------------------------------------------------------------------------------------------------------------------------------------------------------------------------------------------------------------------------------------------------------------------------------------------------------------------------------------------------------------------------------------------------------------------------------------------------------------------------------------------------------------------------------------------------------------------------------------------------------------------------------------------------------------------------------------------------------------------------------------------------------------------------------------------------------------------------------------------------------------------------------------------------------------------------------------------------------------------------------------------------------------------------------------------------------------------------------------------------------------------------------------------------------------------------------------------------------------------------------------------------------------------------------------------------------------------------------------------------------------------------------------------------------------------------------------------------------------------------------------------------------------------------|---------------------------------------------------------------------------------------------------------------------------------------------------------------------------------------------------------------------------------------------------------------------------------------------------------------------------------------------------------------------------------------------------------------------------------------------------------------------------------------------------------------------------------------------------------------------------------------------------------------------------------------------------------------------------------------------------------------------------------------------------------------------------------------------------------------------------------------------------------------------------------------------------------------------------------------------------------------------------------------------------------------------------------------------------------------------------------------------------------------------------------------------------------------------------------------------------------------------------------------------------------------------------------------------------------------------------------------------------------------------------------------------------------------------------------------------------------------------------------------------------------------------------------------------|

|  |                                                                                                                                                                                                                                                                                                                                                                                                                                                                                                                                                                                                                                                                                                                                                                                                                                                                                                                                                                                                                                                                                                                                                                                                                                                                                                                                                                                                                                                                        |                                                                                                                                                                                                                                                                                                                                                                                                                                                                                                                                                                                                                                                                                                                                                                                                                                                                                                                                                                                                                                                                                                                                                                                                                                                                                                                                                                                                                                                                                                          |
|--|------------------------------------------------------------------------------------------------------------------------------------------------------------------------------------------------------------------------------------------------------------------------------------------------------------------------------------------------------------------------------------------------------------------------------------------------------------------------------------------------------------------------------------------------------------------------------------------------------------------------------------------------------------------------------------------------------------------------------------------------------------------------------------------------------------------------------------------------------------------------------------------------------------------------------------------------------------------------------------------------------------------------------------------------------------------------------------------------------------------------------------------------------------------------------------------------------------------------------------------------------------------------------------------------------------------------------------------------------------------------------------------------------------------------------------------------------------------------|----------------------------------------------------------------------------------------------------------------------------------------------------------------------------------------------------------------------------------------------------------------------------------------------------------------------------------------------------------------------------------------------------------------------------------------------------------------------------------------------------------------------------------------------------------------------------------------------------------------------------------------------------------------------------------------------------------------------------------------------------------------------------------------------------------------------------------------------------------------------------------------------------------------------------------------------------------------------------------------------------------------------------------------------------------------------------------------------------------------------------------------------------------------------------------------------------------------------------------------------------------------------------------------------------------------------------------------------------------------------------------------------------------------------------------------------------------------------------------------------------------|
|  | <p> <i>CCDC34, PLEKHB1, TSG101, SART1, GLYATL1, NEU3, ANO9, ARHGFE12, TCIRG1, CAPN1, CCDC41, LEMD3, SCNN1A, SLC2A13, KCTD10, ACSS3, ZNF384, USP44, RPLP0, HRK, ANKLE2, MARS, CHFR, APAF1, TDG, ANO6, ZC3H13, RCBTB2, FAM155A, C13orf27, USPL1, N4BP2L1, CARS2, TPT1, ERCC5, TMTC4, DLEU2, FAM155A, CDK8, KL, COX8C, STON2, RAD51L1, RGS6, GMPR2, EXOC5, NGB, PLEKHH1, SRP54, MPP5, SPATA7, BATF, KIAA1409, TC2N, PAQR5, TTLL13, C15orf29, TRPM7, MIR548H4, IGF1R, C15orf29, UNC45A, LYSDM2, ATP10A, PLA2G4D, C15orf29, CHRNA7, PEX11A, ZNF609, RAB27A, AEN, PSMD7, KARS, PRRT2, CHP2, NRN1L, CRAMP1L, COX4NB, AFG3L1, UNKL, UBE2I, DECR2, MGC23284, BAIAP3, KIF22, RGS11, ZNF598, MTIF, DDX19B, TMC07, ROGDI, LMF1, CDH1, MTHFSD, KIAA0430, KIAA0182, SLC12A4, TBCD, GALK1, WRAP53, TBCD, MRPL27, LOC651250, CENPV, ZPBP2, PHB, CCDC144C, MARCH10, NXN, KRT36, GPRC5C, SPNS3, FOXK2, C17orf70, MTRV2, TCF4, PSMG2, SERPINB12, TNFRSF11A, CPLX4, RPL17, HMSD, ZNF397OS, RNF165, NFIC, TRIP10, CFD, CACNG7, MORG1, NAPSA, LMNB2, C19orf22, MIR519C, RPS9, ZNF585B, SMARCA4, SIN3B, PRR12, FZRI, PRKD2, ZSWIM4, DACT3, ZNF266, ATCAY, REXO1, GGN, AKT1S1, NAPSA, CCDC155, CCDC114, DUS3L, SHISA7, COMP, SIGLEC6, SIPA1L3, ZNF560, TPM4, CD70, BLOC1S3, TOX2, TP53INP2, PIGT, ROMO1, CHRNA4, SLC2A4RG, TBC1D20, ITPA, CHMP4B, C20orf20, BFSP1, KRTAP24-1, NCRNA00175, UBASH3A, SLC37A1, SLC19A1, RABL4, MKL1, UCRC, CYTH4, A4GALT, C22orf27, ADSL, BRD1, CDC42EPI</i> </p> | <p> <i>ITGB5, LAG3, HS.555533, LOC440934, PRDM2, KIF5B, LOC442597, ZCCHC14, NUDT2, ZNF26, ZCCHC8, HS.481464, PPP1CC, WDR64, RBM12, LOC728308, RFP, TRIM4, SAFB2, C19ORF48, PLAG1, CYP11A1, NSMCE1, C8ORF22, ZNF622, PHYHD1, DDX3X, CBRI, ZNF746, PTPRF, KANK2, AKRIC4, GPER, KIAA2010, EMD, ASCC3L1, HPS4, PYCRL, HS.145476, ARFGAP2, CHN2, C17ORF76, BMPRIA, LOC148915, PAN3, NCOA6, TMEM2, TIMM8A, HS.279208, PSD2, RP5-1022P6.2, LOC727927, KCNJ16, SPAG9, SDSL, PLEKHM2, FLYWCHI, FNDC5, MUC20, CASC4, KCNK2, ADAD2, MTG1, LOC441046, ARS2, NRIP2, HS.527535, TRAPPC1, DEFB127, HS.418134, TDRD6, CLK1, CHCHD9, RHOJ, OR7A5, HBB, ANGPT2, GSTZ1, NAP1L1, AXIN1, YARS, MRPS18A, CHUK, FLJ20674, TAKR, RASGRP2, EIF3C, LOC647941, C7ORF26, SF3B1, FAM174B, XPO4, FLJ22639, SPHK2, GNA13, HS.570308, PAXIP1, FRMPD2, C1ORF102, ZNF143, PGA3, HS.554346, SLC26A6, TMCC2, SPTBN4, TYSND1, CYTL1, MANEAL, EIF2S1, JOSD3, FUT8, FOXD1, CSPPI, YPEL4, PRR13, C9ORF78, UCKL1, IRAK2, OTUD4, S100A4, MTHFR, ACSL4, ELF1, PPFIBP1, PDCD2, POLR1E, A2ML1, OR2A14, HMGN2, BRE, PHB2, ODC1, CHCHD8, HS.564803, PASK, LRRFIP2, DOM3Z, KLHDC4, SHPRH, KLC4, STARD7, HSD17B4, HS.550430, ST8SIA4, ILK, PDK2, LRRC51, ATM, SCAPER, COIL, ZCCHC11, TOMM40L, ERCC2, MAX, NFKBIA, LOC283755, HS.156241, SLC44A1, KIF5A, SLC30A3, PPAP2A, FBXO2, RAB7L1, EIF4E2, HS.149811, MDK, SIRT4, LEAP2, HS.560292, YIF1A, KCTD3, ICAM5, AGPAT1, KCNFI, PIN1, MLLT6, CD302, B3GALT, WWOX, USP20, CCDC96, HS.539118, ATXN2L,</i> </p> |
|--|------------------------------------------------------------------------------------------------------------------------------------------------------------------------------------------------------------------------------------------------------------------------------------------------------------------------------------------------------------------------------------------------------------------------------------------------------------------------------------------------------------------------------------------------------------------------------------------------------------------------------------------------------------------------------------------------------------------------------------------------------------------------------------------------------------------------------------------------------------------------------------------------------------------------------------------------------------------------------------------------------------------------------------------------------------------------------------------------------------------------------------------------------------------------------------------------------------------------------------------------------------------------------------------------------------------------------------------------------------------------------------------------------------------------------------------------------------------------|----------------------------------------------------------------------------------------------------------------------------------------------------------------------------------------------------------------------------------------------------------------------------------------------------------------------------------------------------------------------------------------------------------------------------------------------------------------------------------------------------------------------------------------------------------------------------------------------------------------------------------------------------------------------------------------------------------------------------------------------------------------------------------------------------------------------------------------------------------------------------------------------------------------------------------------------------------------------------------------------------------------------------------------------------------------------------------------------------------------------------------------------------------------------------------------------------------------------------------------------------------------------------------------------------------------------------------------------------------------------------------------------------------------------------------------------------------------------------------------------------------|

|  |                                                                                                                                                                                                                                                                                                                                                                                                                                                                                                                                                                                                                                                                                                                                                                                                                                                                                                                                                                                                                                                                                                                                                                                                                                                                                                                                                                                                                                                                                                                     |
|--|---------------------------------------------------------------------------------------------------------------------------------------------------------------------------------------------------------------------------------------------------------------------------------------------------------------------------------------------------------------------------------------------------------------------------------------------------------------------------------------------------------------------------------------------------------------------------------------------------------------------------------------------------------------------------------------------------------------------------------------------------------------------------------------------------------------------------------------------------------------------------------------------------------------------------------------------------------------------------------------------------------------------------------------------------------------------------------------------------------------------------------------------------------------------------------------------------------------------------------------------------------------------------------------------------------------------------------------------------------------------------------------------------------------------------------------------------------------------------------------------------------------------|
|  | <p><i>ATP5J2, ZMYND8, CDK7, C9ORF100, CIP29, C10ORF141, ZNF484, HS.584170, HS.512255, MRPS16, GTF2IRD2, NXF1, FYN, HERC2P2, DDX39, C19ORF30, LOC652264, LOC400214, SIDT2, ZCCHC7, TOP3B, VAC14, OXSR1, C21ORF33, NUP160, SLC25A18, LBR, FDX1L, SFRS14, GAS2L1, HS.564742, TMEM141, MSX2P1, PDE3B, TCEB3B, CTCF, BCKDK, BEAN, ATG7, MAPK10, SOCS3, PRAF2, HMGCS1, HS.518794, S100A4, WDR59, IFP38, HS.483906, LOC644267, LOC116236, TMEM26, AKAP7, CYP4Z1, SASH1, PPEF1, HS.547286, BDH1, SEZ6L2, LDLRAD1, LOC391767, HS.294603, ATOX1, TNS3, SFRS17A, ELOVL6, SYT16, TOPORS, FAM171A1, TTC31, HS.403452, HS.443602, WDR90, PRMT5, CRTAP, LARP7, ZNF409, C1ORF123, C17ORF44, COMMD5, CDK10, HS.574778, ATPAF1, CLCNKA, S100A13, PHYH, FAM160A2, KRT5, HS.292873, IMMP2L, TRAPPC9, KIAA0913, STAU1, HS.209244, LOC728689, HMGB2, HERC2P2, GLOD4, CCDC32, TRMT5, C10ORF39, SEPHS1, PTK2B, SPECCIL, C1ORF97, GINS2, NDUFA10, LOC149448, LOC647859, TRAPPC2, VPS54, RPL13, NUP155, MAPK11, FLJ22222, SLC7A14, FIBP, ENO3, LOC644808, ZNF334, POLR3C, ARMC2, PRPSAP1, OTUB1, GDI2, PEF1, FZD9, LPIN1, SLC6A12, POGK, SASH1, TH1L, HECTD2, TSR2, HS.581083, LOC646144, DYRK4, NPPA, GPSM1, HPS4, NWD1, GABARAP, ABCC12, USP4, HECW2, OVOL2, OGFOD1, SNAI2, FAM122A, C1ORF50, RPL10A, TUFM, MRPL37, CSRP1, HDHD2, CST1, C3ORF63, MEIS3, TAF1C, HS.160027, WBP1, STX12, OR2F1, MRPS6, KCNMB3, STK36, RSPO2, ASPHD1, LRRC16, LSS, DDOST, MGMT, NBPF1, SR140, LAMA3, HS.434108, LOC730455, ALDH1A1, IFNAR2, LOC649679,</i></p> |
|--|---------------------------------------------------------------------------------------------------------------------------------------------------------------------------------------------------------------------------------------------------------------------------------------------------------------------------------------------------------------------------------------------------------------------------------------------------------------------------------------------------------------------------------------------------------------------------------------------------------------------------------------------------------------------------------------------------------------------------------------------------------------------------------------------------------------------------------------------------------------------------------------------------------------------------------------------------------------------------------------------------------------------------------------------------------------------------------------------------------------------------------------------------------------------------------------------------------------------------------------------------------------------------------------------------------------------------------------------------------------------------------------------------------------------------------------------------------------------------------------------------------------------|

|                  |                                                                                                                                                                                                                                                                                                                                                                                                                                                                                                                                                                                                                                                                                                                                                                                                     |                                                                                                                                                                                                                                                                                                                                                                                                                                                                                                                                                                                                                                                                                                                                                                                              |
|------------------|-----------------------------------------------------------------------------------------------------------------------------------------------------------------------------------------------------------------------------------------------------------------------------------------------------------------------------------------------------------------------------------------------------------------------------------------------------------------------------------------------------------------------------------------------------------------------------------------------------------------------------------------------------------------------------------------------------------------------------------------------------------------------------------------------------|----------------------------------------------------------------------------------------------------------------------------------------------------------------------------------------------------------------------------------------------------------------------------------------------------------------------------------------------------------------------------------------------------------------------------------------------------------------------------------------------------------------------------------------------------------------------------------------------------------------------------------------------------------------------------------------------------------------------------------------------------------------------------------------------|
|                  |                                                                                                                                                                                                                                                                                                                                                                                                                                                                                                                                                                                                                                                                                                                                                                                                     | <p>LYRM1, WSB2, IMP4, HS.184721, SLC15A2, HS.543232, HSPB3, THAP11, UBAC2, ARD1A, FIBP, ATP5J2, SCRIB, C10ORF61, HS.545454, HBA2, PRELP, KIF5A, PRKCG, KIAA0090, GCDH, MRPL17, WDR51A, OR51G1, CHP, RNF10, UBAP1, ASMTL, IPO11, ETFB, MANBAL, CREBBP, DUSP1, BTBD6, QDPR, MRAS, C16ORF58, NF1, PITPNM1, FLJ46230, CIAO1, DNAJC5B, LOC388681, ANKFY1, OR5D18, HS.529514, LOC391692, PRELP, HS.120938, TRAF5, HIGD1B, PFKFB2, ST3GAL3, BRUNOL6, SDCCAG3, CGREF1, PRPF19, SAFB2, ABCF2, SOCS4, C11ORF48, PRPF4B, C11ORF61, PHF17, SLC4A11, TPD52L1, AGRP, FRAS1, SFRS4, APLN, ASCL2, BCL2L13, GPKOW, HS.580702, NPIP, CXCR4, HNRPA1L-2, DSCR3, DKFZP586H2123, EXOC6, PPM1B, OSBPL9, USP42, ATP6V0B, LOC651029, ADORA2A, RFW2, ZNF442, SSR4, SRRM2, PPFIA1, ZNF706, C1ORF66, HS.542571, ELA2</p> |
| AD1-Blood (ADNI) | <p>SPOCK3, COL4A6, CLN5, KCTD5, PTGFRN, AGAP1, SLA, TG, CLIP4, CEP57L1, DNAJA3, IL20RA, BMS1P1, BMS1P5, PPP1R12B, SNX19, APCDD1L, TMEM86B, SAPS1, C20orf166, MIR133A2, RNF19A, PNMA5, FNTB, CHURC1-FNTB, MAX, BTLA, HCCA2, SLC25A22, PLCL2, GMDS, USP7, KIAA0930, ZNF204P, ST6GALNAC5, FBLN1, 3/3/2021, HAVCRI, PCGF3, VWA5B1, DUT, C5orf66, FAM19A5, HCCA2DUSP8, EHHADH, EHHADH, STXBP5-AS1, EPSTI1, LOC101927907, LRRTM4, OR4D1, IGF2, HIRA, C1orf57, SFRS16, JAZF1, PHGDH, VPS13B, ANTXR2, NAV2, UTRN, IGFALS, VBPI, GRIA3, IQGAP2, TBCD, FAM3C, DHRS7B, DUSP8, ATP11B, MIR221, MIR222, HPN-AS1, LINC01065, ITLN2, MRPL3, ZNF384, SPRY1, ATF6, EFEMP2, FRMD1, CCS, GJD2, PGK2, SQRD1, MNT, SLC39A8, DLGAP1-AS5, DLGAP1, B4GALT1, FAM53B, C9orf139, FUT7, PPP2R2C, FGGY, AP2A2, GRAMD1B, KYNU</p> | <p>CACNG8, MTOR, B4GALT1, SETD2, ECE1, ECE1, ATP9A, 11-Sep, EPT1, PRDM4, UHRF2, WLS, CYB5B, MMP9, LDLR, APH1B, CAMSAP1, TMX1, RNGTT, MAPK13, TMEM97, PRKCB, KIAA1407, CYR1, HCAR2, CREB5, TMUB2, P116, LPGAT1, KREMEN1, ZNF251, ZNF512B, PPP1R14C, CD300A, PPP1R3D, GRIA3, RWDD3, KCNK3, TRIM8, NABP1, SUGP2, CPD, TEN1-CDK3, ACMSD, FAM185A, HPD, ZNF148, MTERF, PLCL1, LYSMD1, GINS1, OR51E1, MAX, CLMP, NMNAT1, CASK, SLC26A9, REM2, REM2, SLC26A8, LOC101929809, SIGLEC5, EIF1AD, NRTN, UNC5A, PTRF, CD177, CA4, MYL1, SNRPB2, TRIP13, STAG3, ADRB3, C8ORF74, FERD3L, DCHS2, CNGB1, WLS, MAP2, ZMYM6, LSM11, ABRA, CREG2, LCE1C, ASB16-AS1, MXD3, ALX3,</p>                                                                                                                              |

|                  |                                                                                                                                                                                                                                                                                                                                                                                                                                                                                                                                                                   |                                                                                                                                                                                                                                                                                                                                                                                                                                                                                                                                                                                                                                                                                                                                                                                                                                                                                                                                                                                                                                   |
|------------------|-------------------------------------------------------------------------------------------------------------------------------------------------------------------------------------------------------------------------------------------------------------------------------------------------------------------------------------------------------------------------------------------------------------------------------------------------------------------------------------------------------------------------------------------------------------------|-----------------------------------------------------------------------------------------------------------------------------------------------------------------------------------------------------------------------------------------------------------------------------------------------------------------------------------------------------------------------------------------------------------------------------------------------------------------------------------------------------------------------------------------------------------------------------------------------------------------------------------------------------------------------------------------------------------------------------------------------------------------------------------------------------------------------------------------------------------------------------------------------------------------------------------------------------------------------------------------------------------------------------------|
|                  |                                                                                                                                                                                                                                                                                                                                                                                                                                                                                                                                                                   | <p><i>PRDM7, DHX16, CPLX2, METTL10, METTL10, GABRA3, MMP16, FBXL13, MAGIX, ECE1, NIM1*, TENM1, ABHD12B, OR8G5, RIPPLY3, TNFSF14, TTL, CREB5, GINS3, CENPP, ARL11, KIAA0319, LHX4, MAGIX, NSMAF, NSMAF, FBXL13, HIST1H2AA, KCNA2, HIST1H3D, CASCI, TNFSF14, KCNJ1, METTL20, LAMA3, MAPK14, SUPT20HL2, MAPK14, OR6C76, PABPN1L, LRRC6, USP47, OLAH, PRPSAP1, CCL4L2, CCDC90B, CCDC90B, RPAIN, WLS, ATF6, RPTOR, TTTY14, PAPOLA, AHSG, PRKAR2A, MXD3, INSC, TP53TG5, METTL20, SPOCK3, WBP11, WBP11, JADE1, SOX15, CCR5, SLC2A11, FMO1, PXN, USP42, ATF7, CEP72, TTTY9B, TXNRD1, ZNF45, CREB5, SQLE, SNX10, SNX11, KLHL14, GUSBP11, STOML1, MCTP1, KCTD8, ADAMTS7, MBOAT1, MDM2, IQCK, LGALS1, TMEM168, ASAP1, PHLDB1, MTMR10, SFXN5, SNX10, TBC1D3, GOLGA6L1, NCOA3, BLCAP, RAB28, GNAQ, FAM168A, BCL6, MAX, ENSG00000239521, STAT5B, STAT5B, LOC254896, ZNF511, EIF3H, PRKACA, C9ORF84, SETD6, SUGP1, SMARCD1, PHLDB1, HERC2P9, TDRD1, IGSF6, ITGAX, CRI, DAPPI, BRD4, ZNF215, MSRA, ENSG00000215265, LRP10, ATP6V0D1, TMC5</i></p> |
| AD2-Blood (ADNI) | <p><i>SPOCK3, XYLT1, CNKSR3, AGAP1, C17orf75, CEP57L1, UNC80, CRH, TMCC1, NDUFAF6, SNX19, LOC399959, MIR125B1, NAT15, TULP4, CTBP2, IKZF5, TBC1D22B, RNF19A, OR8D1, FNTB, CHURC1-FNTB, MAX, BTLA, HCCA2, REV1, TTC21B, USP7, DDX4, ST6GALNAC5, B4GALT1, PLCB1, PDE11A, INTS8, HAVCRI, CHN2, TRABD2A, NXT2, PCGF3, FMNL2, VWA5B1, RCOR2, OSBPL5, GLG1, PRICKLE2-AS1, SHANK2, SOGA1, HCCA2, DUSP8, LOC100130357, PHACTR1, FBXL22, BRD9, INS-IGF2, IGF2, OSBPL9, C7orf50, TACC1, C10orf40, LINC00944, SACS, FZD1, RSPO2, AIFM2, JAZF1, EBF3, CHORDC1, FGFR4,</i></p> | <p><i>FAF2, NDUFA8, ECE1, ECE1, SLC39A9, MKLN1, 11-Sep, ATMIN, SNRPE, IPO5, PRDM4, ACAP2, C14ORF166, GLIS2, LARS2, PSD3, PAICS, TMEM41A, PEX5, UBL4A, OSTM1, HEATR6, USP4, NFU1, CAMSAP1, PDE5A, ELP3, BCL6, TMX1, LYRM4, RNGTT, TMEM97, TMEM97, ZW10, PTPRD, KIAA1407, PARS2, NT5C2, HCAR2, RAB5A, CREB5, GPN1, CEP41, ZBTB9, ABHD5, PHF10, PHF10, ZSCAN26, ZNF853, GPR68, HCN4, DOK5, PPP1R3D, ANP32E, HNRNPL,</i></p>                                                                                                                                                                                                                                                                                                                                                                                                                                                                                                                                                                                                          |

|                  |                                                                                                                                                                                                                                                                                                                                                                                                                                                                                                    |                                                                                                                                                                                                                                                                                                                                                                                                                                                                                                                                                                                                                                                                                                                                                                                                                                                                                                                                                                                                                                                                                                                                                                                                                                                                                                                                                                                                                 |
|------------------|----------------------------------------------------------------------------------------------------------------------------------------------------------------------------------------------------------------------------------------------------------------------------------------------------------------------------------------------------------------------------------------------------------------------------------------------------------------------------------------------------|-----------------------------------------------------------------------------------------------------------------------------------------------------------------------------------------------------------------------------------------------------------------------------------------------------------------------------------------------------------------------------------------------------------------------------------------------------------------------------------------------------------------------------------------------------------------------------------------------------------------------------------------------------------------------------------------------------------------------------------------------------------------------------------------------------------------------------------------------------------------------------------------------------------------------------------------------------------------------------------------------------------------------------------------------------------------------------------------------------------------------------------------------------------------------------------------------------------------------------------------------------------------------------------------------------------------------------------------------------------------------------------------------------------------|
|                  | <p><i>TACCI, PHGDH, VPS13B, TMCO3, MYOM2, SETBP1, ANTXR2, UTRN, BTG4, MIR34C, MIR34B, EMC7, TSC1, IGFALS, DGKE, STEAP2, STEAP2-AS1, IQGAP2, HAPLN1, RAB31L1, TBCD, UST, PDE4C, COA4, PAAF1, SGSM1, RPA3, UMAD1, CMIP, HERC2, DUSP8, CHRM2, RIC8B, MIR221, MIR222, HPN-AS1, ITLN2, ANKRD62, MRPL3, TRIM55, LOC100996324, PTPN4, TXLNG, GNG12, B3GALT5, LOC283761, ELMO1, FAM126A, LMCD1-AS1, MYCNUT, NCALD, KCNB1, FAM53B, IMPAD1, PTPRN2, FAM149A;FAM149A, GALNT18, NSMCE2, FAM5C, C7orf50</i></p> | <p><i>TRIM8, NABP1, MAP6D1, CPD, TEN1-CDK3, ADAMTSL3, ZNF148, MTERF, MTHFD1L, MAX, NFU1, CLMP, AOC2, REM2, REM2, PRPF4, SLC26A8, LOC101929809, SIGLEC5, HECW2, PPP1R8, AKIRIN1, LRRN1, ATXN7, ZNF789, SNRPB2, SLC22A1, ACKR2, KCNA3, TRIM7, TP53TG3, GON4L, MANBAL, SLC35B4, ZMYM6, UMPS, LRRK2, SMC02, TNP2, METTL10, METTL10, PODXL, NAIP, FBXL13, SLC22A10, MEFV, ECE1, S100A7A, ABHD12B, SLC02B1, NFE2L2, CACUL1, MAP3K2, CREB5, GINS3, PTPRE, BCL6, ZFYVE16, TNIK, STAG2, ATP10A, ARL11, KIAA0319, FBXL13, P2RY10, TNFSF14, KCNJI, METTL20, SIM2, MAPK14, CD46, MAPK14, OR4B1, MTERFD2, PPAPDC2, STAG2, USP47, MOSPD2, RPL32, PRPSAP1, STGC3*, TDP1, RPAIN, ZWILCH, ATF6, HN1L, AB11, ELF2, ELF2, TSC22D4, SPIDR, INTS6, USP15, RASSF2, SETD6, MXD3, NPY6R, 1-Mar, METTL20, JADE1, TCAIM, SLC2A14, SERINC2, SOX15, PLEKHH1, ZDHHC17, PXN, AB11, SMEK1, SNW1, VPS13B, BCL6, CREB5, SNX10, TSC22D4, CD46, LBR, RTCB, MCTP2, MEFV, MCTP1, GABRG1, RTCB, PGM2, MBOAT1, NIF3L1, GPC3, TSC22D4, TMEM168, SPAG9, ASAP1, C16ORF80, VTCN1, LOC441155, NUPL1, KCNU1, SNRPB2, MLH1, MTMR10, PISD, RASSF2, SNX10, TBC1D3, FAM157B, SNHG1, EDEM3, MUC20, BAZ1A, NCOA3, RAB31P, TRIM25, RFWD2, HEATR1, ZNF281, GNAQ, CHRNA3, FAM168A, ZNF284, BCL6, USP15, STAT5B, STAT5B, ZNF511, EIF3H, VNN3, C9ORF84, GIT2, TALDO1, SGSH, HERC2P9, RANBP10, IGSF6, PSMB9, ITGAX, TSPAN32, ESR2, CRI, DAPPI, LRP10, TMC5, RBPJ</i></p> |
| AD3-Blood (ADNI) | <p><i>NLGN1, DIDO1, BMS1P1, PTPN20B, PTPN20A, PLCL2, CDHR2, DGKH, B4GALT1, HAVCRI, SERINC5, STXBP5-AS1,</i></p>                                                                                                                                                                                                                                                                                                                                                                                    | <p><i>NEU1, UNC119B, ATMIN, PSD3, OSTM1, MINOS1, BCL6, MTSS1L, TMEM97, TMEM97, ANKRD12,</i></p>                                                                                                                                                                                                                                                                                                                                                                                                                                                                                                                                                                                                                                                                                                                                                                                                                                                                                                                                                                                                                                                                                                                                                                                                                                                                                                                 |

|  |                                                                                                       |                                                                                                                                                                                                                                                                                                                                                                                                                                                                                                                                                    |
|--|-------------------------------------------------------------------------------------------------------|----------------------------------------------------------------------------------------------------------------------------------------------------------------------------------------------------------------------------------------------------------------------------------------------------------------------------------------------------------------------------------------------------------------------------------------------------------------------------------------------------------------------------------------------------|
|  | <i>TBX5, PRKAR1B, VBP1, TLR8, LOC349408, JUB, GRIK4, CCDC74B, HLA-DQB1, ATF6, CCS, SLC39A8, CCNJL</i> | <i>KIAA1407, ACTA2, HCAR2, CREB5, HLA-DQA1, HOXA9, KCNK3, GPC4, FAM185A, ORC6, MTHFD1L, MTHFD1L, HYKK, AOC2, PRPF4, SLC26A8, LSMEM1, TRIM7, ASB16-AS1, METTL6, LMOD2, NAIP, TRPC3, PRG3, TRPV1, HYKK, COX15, LDLRAD1, NPC1L1, MAPK14, MAPK14, LRRC6, CCP110, SPATA18, BZW2, SLC2A14, ZDHHC17, TRPM8, CTPS1, FAM221B, RNF17, ANO3, MCTP1, MBOAT1, TAC3, IQCK, VTCN1, GDPD3, KLK8, SEC14L2, NUS1P3, TBC1D3, SNHG1, GOLGA6L1, ZNF689, FAM168A, BCL6, ENSG00000239521, LOC254896, ENSG00000224113, ARL2, DNMI, IGSF6, TSPAN32, MTIDP, VASH2, STMN4</i> |
|--|-------------------------------------------------------------------------------------------------------|----------------------------------------------------------------------------------------------------------------------------------------------------------------------------------------------------------------------------------------------------------------------------------------------------------------------------------------------------------------------------------------------------------------------------------------------------------------------------------------------------------------------------------------------------|

**Table S4** | Molecular pathways presence levels across AD subtypes and omics modalities.

| <b>Molecular pathway</b>                                          | <b>Abbreviation</b> | <b>RN A AD 1-Brain</b> | <b>RN A AD 2-Brain</b> | <b>RN A AD 3-Brain</b> | <b>DN Am AD 1-Brain</b> | <b>DN Am AD 2-Brain</b> | <b>DN Am AD 3-Brain</b> | <b>RN A AD 1-Blood</b> | <b>RN A AD 2-Blood</b> | <b>RN A AD 3-Blood</b> | <b>DN Am AD 1-Blood</b> | <b>DN Am AD 2-Blood</b> | <b>DN Am AD 3-Blood</b> |
|-------------------------------------------------------------------|---------------------|------------------------|------------------------|------------------------|-------------------------|-------------------------|-------------------------|------------------------|------------------------|------------------------|-------------------------|-------------------------|-------------------------|
| Thyrotropin-releasing hormone receptor signaling pathway          | TRH                 | 4.3                    | 0.5                    | 5.5                    | 2.7                     | 0.6                     | 0.5                     | 2.8                    | 1.4                    | 0                      | 4.3                     | 5.1                     | 4.5                     |
| Wnt signaling pathway                                             | Wnt                 | 2.2                    | 1                      | 2.5                    | 0.7                     | 0.6                     | 1.1                     | 1.1                    | 1.4                    | 4.3                    | 0                       | 3.4                     | 9.1                     |
| Inflammation mediated by chemokine and cytokine signaling pathway | Chemokine/cytokine  | 4.3                    | 0.5                    | 0.6                    | 0.7                     | 2.3                     | 1.1                     | 3.4                    | 1.4                    | 2.1                    | 4.3                     | 1.7                     | 4.5                     |
| 5HT <sub>2</sub> type receptor mediated signaling pathway         | 5HT <sub>2</sub>    | 5                      | 0.5                    | 0.6                    | 1.3                     | 0.6                     | 1.1                     | 0.6                    | 1.4                    | 4.3                    | 4.3                     | 1.7                     | 4.5                     |

|                                                                                   |                          |     |     |     |      |     |     |     |     |     |     |     |     |
|-----------------------------------------------------------------------------------|--------------------------|-----|-----|-----|------|-----|-----|-----|-----|-----|-----|-----|-----|
| Metabotropic glutamate receptor group II pathway                                  | mGluR II                 | 0   | 3   | 1.2 | 11.4 | 1.7 | 1.6 | 0.6 | 0   | 0   | 0   | 1.7 | 4.5 |
| Integrin signalling pathway                                                       | Integrin                 | 2.9 | 0.5 | 1.2 | 1.3  | 0.6 | 7.4 | 0.6 | 2.7 | 2.1 | 4.3 | 1.7 | 0   |
| Heterotrimeric G-protein signaling pathway-Gi alpha and Gs alpha mediated pathway | Gi $\alpha$ /Gs $\alpha$ | 0.7 | 0.5 | 1.2 | 0.7  | 1.7 | 1.6 | 2.2 | 6.8 | 2.1 | 0   | 1.7 | 4.5 |
| Interleukin signaling pathway                                                     | Interleukin              | 0   | 4   | 3.1 | 0    | 1.1 | 2.1 | 0.6 | 4.1 | 0   | 8.7 | 0   | 0   |
| Alzheimer disease-amyloid secretase pathway                                       | AD-Amyloid secretase     | 4.3 | 4.5 | 0.6 | 0.7  | 0.6 | 3.2 | 3.4 | 1.4 | 2.1 | 0   | 1.7 | 0   |
| Oxytocin receptor mediated signaling pathway                                      | OXTR                     | 0.7 | 0.5 | 0.6 | 0.7  | 2.3 | 0.5 | 1.7 | 1.4 | 0   | 4.3 | 3.4 | 4.5 |
| Histamine H1 receptor mediated signaling pathway                                  | H <sub>1</sub>           | 1.4 | 1   | 0.6 | 0    | 2.8 | 1.6 | 1.1 | 1.4 | 0   | 4.3 | 1.7 | 4.5 |
| Interferon-gamma signaling pathway                                                | INF- $\gamma$            | 0.7 | 2.5 | 3.1 | 5.4  | 0   | 1.6 | 1.1 | 2.7 | 2.1 | 0   | 0   | 0   |
| CCKR signaling map                                                                | CCKR                     | 1.4 | 0.5 | 1.2 | 0.7  | 3.4 | 1.1 | 0.6 | 1.4 | 2.1 | 0   | 6.8 | 0   |
| Cadherin signaling pathway                                                        | Cadherin                 | 1.4 | 4   | 1.8 | 1.3  | 1.7 | 0.5 | 0   | 0   | 2.1 | 0   | 1.7 | 4.5 |
| Apoptosis signaling pathway                                                       | Apoptosis                | 0.7 | 0.5 | 2.5 | 0.7  | 1.1 | 0.5 | 2.2 | 1.4 | 0   | 4.3 | 0   | 4.5 |



|                                                             |                                |     |     |     |     |      |      |     |     |     |     |     |     |
|-------------------------------------------------------------|--------------------------------|-----|-----|-----|-----|------|------|-----|-----|-----|-----|-----|-----|
| p53 pathway                                                 | p53                            | 3.6 | 1   | 2.5 | 1.3 | 2.3  | 2.1  | 3.9 | 0   | 0   | 0   | 1.7 | 0   |
| Transcription regulation by bZIP transcription factor       | bZIP                           | 3.6 | 0.5 | 5.5 | 0   | 0    | 0    | 0.6 | 1.4 | 2.1 | 0   | 0   | 4.5 |
| Corticotropin releasing factor receptor signaling pathway   | CRFR                           | 0   | 0   | 0   | 0.7 | 1.1  | 10.5 | 1.1 | 1.4 | 0   | 0   | 3.4 | 0   |
| Gonadotropin-releasing hormone receptor pathway             | GRHR                           | 0.7 | 2.5 | 1.2 | 0.7 | 1.1  | 0.5  | 1.7 | 1.4 | 2.1 | 0   | 1.7 | 4.5 |
| FGF signaling pathway                                       | FGF                            | 2.2 | 0.5 | 1.2 | 0.7 | 1.1  | 0.5  | 1.1 | 2.7 | 2.1 | 4.3 | 1.7 | 0   |
| $\beta_1$ adrenergic receptor signaling pathway             | $\beta_1$ receptor             | 0   | 0   | 0   | 0.7 | 10.2 | 0.5  | 2.8 | 0   | 0   | 0   | 3.4 | 0   |
| Huntington disease                                          | Hunt.                          | 0.7 | 0.5 | 0.6 | 2.7 | 0.6  | 1.1  | 0   | 0   | 2.1 | 4.3 | 0   | 4.5 |
| Muscarinic acetylcholine receptor 1 and 3 signaling pathway | M <sub>1</sub> /M <sub>3</sub> | 4.3 | 1.5 | 3.7 | 0   | 0.6  | 1.6  | 0.6 | 1.4 | 0   | 0   | 3.4 | 0   |
| Metabotropic glutamate receptor group III pathway           | mGluR III                      | 0   | 4   | 0.6 | 0.7 | 1.1  | 1.1  | 0.6 | 0   | 0   | 4.3 | 0   | 4.5 |
| Angiogenesis                                                | Angiogenesis                   | 2.2 | 1   | 3.1 | 2   | 0.6  | 0.5  | 2.2 | 1.4 | 2.1 | 0   | 1.7 | 0   |
| T cell activation                                           | T cell                         | 6.5 | 3.5 | 0.6 | 2   | 0.6  | 0.5  | 0   | 0   | 2.1 | 0   | 0   | 0   |
| EGF receptor signaling pathway                              | EGFR                           | 0.7 | 0.5 | 2.5 | 0.7 | 1.7  | 1.1  | 0.6 | 1.4 | 2.1 | 4.3 | 0   | 0   |

|                                                                                   |                                |     |     |     |     |     |     |     |     |     |     |     |     |
|-----------------------------------------------------------------------------------|--------------------------------|-----|-----|-----|-----|-----|-----|-----|-----|-----|-----|-----|-----|
| Oxidative stress response                                                         | Oxi.                           | 0.7 | 0.5 | 0.6 | 0   | 0   | 0   | 0.6 | 2.7 | 4.3 | 4.3 | 1.7 | 0   |
| Hedgehog signaling pathway                                                        | Hedgehog                       | 3.6 | 0.5 | 1.8 | 0.7 | 0.6 | 2.6 | 0.6 | 0   | 0   | 0   | 0   | 4.5 |
| Heterotrimeric G-protein signaling pathway-Gq alpha and Go alpha mediated pathway | Gq $\alpha$ /Go $\alpha$       | 0.7 | 0.5 | 0.6 | 2.7 | 0.6 | 4.2 | 2.2 | 1.4 | 0   | 0   | 1.7 | 0   |
| Ionotropic glutamate receptor pathway                                             | iGluR                          | 0   | 0   | 0   | 0.7 | 0   | 1.1 | 2.2 | 0   | 0   | 4.3 | 1.7 | 4.5 |
| Endothelin signaling pathway                                                      | Endothelin                     | 0.7 | 2   | 0.6 | 0.7 | 0   | 0   | 1.1 | 1.4 | 0   | 0   | 3.4 | 4.5 |
| VEGF signaling pathway                                                            | VEGF                           | 1.4 | 0.5 | 0.6 | 2.7 | 0.6 | 1.1 | 3.9 | 1.4 | 2.1 | 0   | 0   | 0   |
| Alzheimer disease-presenilin pathway                                              | AD-Presenilin                  | 0.7 | 0.5 | 1.2 | 2   | 0.6 | 1.6 | 1.1 | 2.7 | 2.1 | 0   | 1.7 | 0   |
| Notch signaling pathway                                                           | Notch                          | 0.7 | 0.5 | 2.5 | 0   | 6.8 | 0.5 | 1.1 | 1.4 | 0   | 0   | 0   | 0   |
| Ubiquitin proteasome pathway                                                      | Ubiquitin                      | 1.4 | 3   | 4.3 | 0.7 | 0.6 | 1.1 | 2.2 | 0   | 0   | 0   | 0   | 0   |
| Parkinson disease                                                                 | PD                             | 0.7 | 0.5 | 3.7 | 0.7 | 1.1 | 1.1 | 0.6 | 2.7 | 2.1 | 0   | 0   | 0   |
| Muscarinic acetylcholine receptor 2 and 4 signaling pathway                       | M <sub>2</sub> /M <sub>4</sub> | 0   | 0.5 | 0.6 | 1.3 | 0.6 | 0.5 | 0.6 | 0   | 0   | 0   | 3.4 | 4.5 |
| Insulin/IGF pathway-protein kinase                                                | IGF pathway                    | 0   | 0   | 0   | 0.7 | 1.1 | 1.1 | 2.8 | 0   | 0   | 4.3 | 1.7 | 0   |

|                                                                          |                |     |     |     |     |     |     |     |     |     |   |     |     |
|--------------------------------------------------------------------------|----------------|-----|-----|-----|-----|-----|-----|-----|-----|-----|---|-----|-----|
| B signaling cascade                                                      |                |     |     |     |     |     |     |     |     |     |   |     |     |
| Nicotine pharmacodynamics pathway                                        | Nicotine       | 0.7 | 1.5 | 0.6 | 0.7 | 1.1 | 1.1 | 1.1 | 2.7 | 2.1 | 0 | 0   | 0   |
| Toll receptor signaling pathway                                          | Toll           | 1.4 | 0.5 | 0.6 | 0   | 0   | 0   | 1.1 | 1.4 | 2.1 | 0 | 0   | 4.5 |
| Vitamin D metabolism and pathway                                         | Vit. D         | 0.7 | 0.5 | 3.1 | 2.7 | 1.1 | 1.1 | 0   | 0   | 2.1 | 0 | 0   | 0   |
| General transcription regulation                                         | GTR            | 0.7 | 1   | 3.1 | 0   | 0   | 0   | 1.1 | 5.4 | 0   | 0 | 0   | 0   |
| Angiotensin II-stimulated signaling through G proteins and beta-arrestin | Angiotensin II | 0   | 0.5 | 0   | 0   | 1.1 | 1.1 | 2.8 | 4.1 | 0   | 0 | 1.7 | 0   |
| General transcription by RNA polymerase I                                | RNA poly. I    | 5   | 4.5 | 0.6 | 0   | 0   | 0   | 1.1 | 0   | 0   | 0 | 0   | 0   |
| TGF-beta signaling pathway                                               | TGF- $\beta$   | 1.4 | 1.5 | 0.6 | 0.7 | 1.1 | 0.5 | 1.7 | 1.4 | 2.1 | 0 | 0   | 0   |
| Cytoskeletal regulation by Rho GTPase                                    | $\rho$ -GTPase | 4.3 | 1   | 1.8 | 0.7 | 0.6 | 0   | 0   | 0   | 2.1 | 0 | 0   | 0   |
| p53 pathway by glucose deprivation                                       | p53-glucose    | 0   | 0   | 0   | 0   | 3.4 | 3.7 | 1.7 | 0   | 0   | 0 | 1.7 | 0   |
| Opioid proenkephalin pathway                                             | Opioid PENK    | 0.7 | 2   | 0.6 | 0   | 1.1 | 1.1 | 1.1 | 0   | 2.1 | 0 | 1.7 | 0   |
| B cell activation                                                        | B cell         | 0.7 | 1   | 0.6 | 1.3 | 1.1 | 0   | 2.2 | 1.4 | 2.1 | 0 | 0   | 0   |
| Cholesterol biosynthesis                                                 | Cholesterol    | 2.9 | 0.5 | 2.5 | 1.3 | 2.3 | 0   | 0.6 | 0   | 0   | 0 | 0   | 0   |
| Enkephalin release                                                       | ENK            | 1.4 | 1   | 1.2 | 1.3 | 0.6 | 0.5 | 2.2 | 0   | 0   | 0 | 1.7 | 0   |
| Nicotinic acetylcholine receptor                                         | nAChR          | 0   | 4   | 0.6 | 0.7 | 0   | 1.1 | 0   | 1.4 | 2.1 | 0 | 0   | 0   |

|                                                           |                      |     |     |     |     |     |     |     |     |     |     |     |     |
|-----------------------------------------------------------|----------------------|-----|-----|-----|-----|-----|-----|-----|-----|-----|-----|-----|-----|
| signaling pathway                                         |                      |     |     |     |     |     |     |     |     |     |     |     |     |
| P53 pathway feedback loops 1                              | p53 fb 1             | 0   | 0   | 0   | 2.7 | 2.8 | 2.6 | 1.7 | 0   | 0   | 0   | 0   | 0   |
| Dopamine receptor mediated signaling pathway              | Dopamine             | 1.4 | 0.5 | 1.2 | 0   | 0.6 | 2.1 | 1.7 | 0   | 2.1 | 0   | 0   | 0   |
| 5HT <sub>1</sub> type receptor mediated signaling pathway | 5HT <sub>1</sub>     | 0   | 0   | 0   | 1.3 | 1.1 | 0.5 | 0.6 | 0   | 4.3 | 0   | 1.7 | 0   |
| p53 pathway feedback loops 2                              | p53 fb 2             | 0.7 | 1   | 0.6 | 0.7 | 0.6 | 0.5 | 0.6 | 2.7 | 2.1 | 0   | 0   | 0   |
| GABA <sub>B</sub> receptor II signaling                   | GABA <sub>B</sub> II | 0   | 0.5 | 0   | 0.7 | 1.1 | 1.6 | 0.6 | 0   | 0   | 0   | 0   | 4.5 |
| Mannose metabolism                                        | Mannose              | 0.7 | 4   | 0   | 0   | 0   | 0   | 0   | 0   | 0   | 4.3 | 0   | 0   |
| Opioid proopiomelanocortin pathway                        | POMC                 | 0   | 0   | 0   | 0.7 | 0.6 | 1.6 | 2.2 | 0   | 2.1 | 0   | 1.7 | 0   |
| Metabotropic glutamate receptor group I pathway           | mGluR I              | 0   | 0   | 0   | 0   | 0   | 1.1 | 0.6 | 2.7 | 0   | 0   | 0   | 4.5 |
| Ras Pathway                                               | Ras                  | 0.7 | 2   | 0.6 | 0.7 | 0.6 | 0   | 0.6 | 1.4 | 2.1 | 0   | 0   | 0   |
| mRNA splicing                                             | mRNA splicing        | 0   | 1   | 3.7 | 0   | 0   | 0   | 1.1 | 2.7 | 0   | 0   | 0   | 0   |
| Opioid prodynorphin pathway                               | PDYN                 | 0   | 0   | 0   | 1.3 | 0.6 | 1.1 | 0   | 0   | 2.1 | 0   | 3.4 | 0   |
| Pentose phosphate pathway                                 | PPP                  | 0   | 0   | 0   | 0   | 0   | 0   | 0   | 4.1 | 0   | 4.3 | 0   | 0   |
| 5HT <sub>4</sub> type receptor mediated signaling pathway | 5HT <sub>4</sub>     | 0   | 0   | 0   | 0.7 | 1.1 | 1.6 | 1.1 | 0   | 2.1 | 0   | 1.7 | 0   |





|                                       |             |     |     |     |   |   |   |     |   |   |   |   |   |
|---------------------------------------|-------------|-----|-----|-----|---|---|---|-----|---|---|---|---|---|
| Methionine biosynthesis               | Methionine  | 0.7 | 0.5 | 0.6 | 0 | 0 | 0 | 0   | 0 | 0 | 0 | 0 | 0 |
| Pyruvate metabolism                   | Pyruvate    | 0   | 1.5 | 0   | 0 | 0 | 0 | 0   | 0 | 0 | 0 | 0 | 0 |
| TCA cycle                             | TCA         | 0   | 0.5 | 0.6 | 0 | 0 | 0 | 0   | 0 | 0 | 0 | 0 | 0 |
| Axon guidance mediated by semaphorins | Semaphorins | 0   | 0.5 | 0.6 | 0 | 0 | 0 | 0   | 0 | 0 | 0 | 0 | 0 |
| Plasminogen activating cascade        | Plasminogen | 0   | 0   | 0   | 0 | 0 | 0 | 1.1 | 0 | 0 | 0 | 0 | 0 |

**Table S5** | Differentially expressed monocyte genes for brain-derived AD subtypes.

| Tissue             | Genes                                                                                                                                                                                                                                                                                                                                                                                                                                                                                                                                                                                                                                                                                                                                                                                                                                                                                                                                                                                                                                                                                                                                                                                                                                                                                                                                                                                                                  |
|--------------------|------------------------------------------------------------------------------------------------------------------------------------------------------------------------------------------------------------------------------------------------------------------------------------------------------------------------------------------------------------------------------------------------------------------------------------------------------------------------------------------------------------------------------------------------------------------------------------------------------------------------------------------------------------------------------------------------------------------------------------------------------------------------------------------------------------------------------------------------------------------------------------------------------------------------------------------------------------------------------------------------------------------------------------------------------------------------------------------------------------------------------------------------------------------------------------------------------------------------------------------------------------------------------------------------------------------------------------------------------------------------------------------------------------------------|
| AD1-Brain (ROSMAP) | <i>ARID3C, ASTN1, CD9, CDC42P2, CEP295NL, CLPTMILP1, H2BP3, HMGNI1P9, HNRNPA1P23, KIF3C, LIN54, LINC02218, MSH5-SAPCD1, MTRF1, RNA5SP423, RNF126, RPL13P12, RPL23AP40, RPL23AP7, RPL26P20, RPL6P9, RPS10P16, SNRPGP12, TCEAL6, TRAT1, UCP3, UPF3B, VDAC1P2, VNIR107P, ZNF37CP, ADGRG7, ADORA2B, AOX1, ARL2BPP1, ARSJ, BANF1P4, BAZ2B, CAPZA1P5, CCDC122, CCDC17, CENPUP1, CEP164, CEP57, CERS4, COL9A1, CRISP1, CSF1R, CTAGE13P, CUX1, CYCSP39, DENND5A, DIPK1A, DUX4L13, EFCAB2, ELL2P2, FAHD2P1, FCN2, FGF7P6, FNTAP1, GAPDHP54, GBAP1, GENI, GOLGA6L3, GP6, GPR42, GSG1, GSK1, H2AC18, H2AC20, HDAC3, HMGB1P47, HOXB7, HSD17B10, HTT, IFI35, IGHM, IGKV1-8, KLF4P1, KRTAP10-1, LHX6, LPAR1, LRRFIP2P1, LTBP4, MAGEA3, MEST, METTL22, MRGBP, MTCO1P31, MTCO2P34, MTFRIL, MTHFSD, MTND1P19, MTND1P2, MYLIP, NDRG4, NPY, NUDT11, NXF5, OFD1P6Y, OR11Q1P, OR2F2, OR5F1, PAQR5, PCBP2P1, PCDH19, PCP2, PICK1, PKD1P3, PORCN, PPIAP28, PSD4, PTH2R, PTP4A1P2, RAB11AP1, RHEBP1, RHOB, RHPN2, RNA5SP197, RNA5SP223, RNA5SP27, RNA5SP346, RNA5SP508, RNLS, RPL22L1, RPL30P10, RPL34P17, RPL36AP36, RPL7AP71, RPN2, RPS23P5, RPS24P17, RPS3AP9, SEMA4G, SERBP1P6, SERPINB11, SETD5, SFXN5, SNRPEP3, SOWAHB, SPATA24, SPICE1, SS18L1, SUMO2P2, SYCP2L, TAF1, TBX2, TCP10L2, TFPI2, THEM7P, TMEM178A, TP53TG3GP, TRAPPC13P1, UBE2C, UBE2W, VNIR3, VWDE, WNT2, ZBTB47, ZDHHC13, ZFYVE9P1, ZNF209P, ZNF23, ZNF354C, ZNF519P4</i> |
| AD2-Brain (ROSMAP) | <i>ASTN1, CEP295NL, CLPTMILP1, CYP2AB1P, DLSTP1, FUZ, HNRNPA3P13, IGKV3OR22-2, KIF3C, LIN54, LINC02218, MSH5-SAPCD1, MTRF1, OR3A1, OR4H12P, RNA5SP423, RNA5SP492, RNF126, RPL13P12, RPL23AP40, RPL23AP7, RPL26P20, RPL35AP12, RPL6P9, RPS10P16, SMIM42, SNRPGP12, TAAR8, TRAT1, U2AF1, UCP3, UPF3B, VDAC1P2, VNIR107P, ABL1, ACAT2, ACBD5, ACOT9, ACTBP2, ACTG1P25, ACTN4P1, ACTR1A, ADAD1, ADAMTS17, ADAMTS4, ADAMTSL2, ADAP1, ADGRE2, AICDA, AIPL1, AKAP13, AKRIC6P, ANKRD26P4, ANKRD36BP2, ANKRD45, ANKRD66, ANKRD9, APIM1, AP5BI, APCS, APIP, ARAF, ARAFPI, ARAP2, ARF6, ARFGF1, ARGFX, ARHGAP42P4, ARHGDIB, ARID5A, ARL10, ARL11, ARL8A, ARPIN, ARRBI, ARR2, ATG12P2, ATG3P1, ATN1, ATP5MC2P1,</i>                                                                                                                                                                                                                                                                                                                                                                                                                                                                                                                                                                                                                                                                                                                |

ATP5PBP3, ATP5PD, ATP5PDP1, ATP6V1B2, ATXN1L, B4GALT5, BCAS4, BCRP9, BEND2, BEST4, BMP7, BRI3BP, C19orf47, C19orf48, C2orf83, C7, CALHM2, CAPN2, CARTPT, CBX3P1, CBY1, CC2D2B, CCAR2, CCDC134, CCDC144A, CCDC74A, CCL24, CCNK, CCNYL7, CCR12P, CCR3, CD109, CD300C, CD300E, CD44, CD68, CD74, CD93, CDC37, CDC37L1, CDC73, CDH9, CDK10, CDKL1, CDRT15P9, CENPN, CEP78, CHD1, CHP2, CHRNA5, CLN3, CLPX, CNKSR3, CNOT8, COA7, COG5, COL6A3, COPG1, COPS2, CPHXL, CREG1, CRISP1, CRPPA, CRY1, CSDC2, CSF2, CSF2RA, CSN3, CSTF2T, CT45A5, CUL4B, CYB5AP2, CYBA, CYP1A2, CYP27C1, CYP2B6, CYP2J2, DAXX, DBT, DCAF1, DCN, DDA1, DEFA1, DEFB125, DENND5B, DHFR, DHFRP3, DHTKD1, DHX33, DLX6, DOC2B, DPF1, DPY19L3, DUSP12P1, DUSP5, EAF1, EDC4, EEF1A1, EEF1A1P33, EEF1A1P38, EFHD2, EHHADH, EIF1AD, EIF1B, EIF2AP4, EIF2S2P1, EIF2S2P3, EIF3FP3, EIF4A1P11, EIF4EP1, ELF2, ELF4, ELOCP33, EMC1, EMC3-AS1, EML2, EMP2, ENO3, EP400P1, ERCC4, ERF, ERGIC1, ERVV-2, EXOC5, EXOC7, EXT1, FABP5P14, FABP5P9, FAM151B, FAM172BP, FAM241A, FAM30B, FAM3C2P, FANCE, FARSA, FAUP1, FBRS, FBXL18, FBXO2, FBXW2, FCHO2, FEM1A, FGD5, FGFBP3, FKBP14, FNDC4, FNDC9, FOS, FOXK1, FOXRED2, FRY, FUT1, FZD4, FZD5, G6PD, GART, GATAD1, GCLM, GDPGP1, GET4, GF11B, GID4, GIMAP1-GIMAP5, GIMAP2, GJCI, GLIPR2, GLMN, GLRXP3, GLULP4, GMFB, GMPS, GPR108, GPR142, GPR153, GRM6, GTDC1, GTF2IP20, GTF2IP23, GTSF1, GYPC, GZF1, H1-2, H1-3, H2AC19, H2AC21, H2BC10, H3-3B, H3C4, H3P31, HACD2, HCARI, HDHD3, HFE, HIKESHI, HLA-DQA2, HMGA1P1, HMGB1P38, HMGB3P18, HMG2N2P20, HMG2N2P36, HNRNPA1P5, HNRNPH1, HOXD4, HRK, HSP90AA4P, HSP90AB7P, HSPBAP1, HSPE1, HSPE1P10, HSPE1P20, HTR3B, HYKK, ID1, IER2, IFFO1, IFT22, IGDCC4, IGHV7-27, IGHV7-56, IGKV2D-23, IKZF3, IL10RA, IL17RA, INGX, INO80C, INPP5F, INTS11, IRF9, IRS2, KATNAL1, KCNA4, KCNJ12, KDM5B, KIAA1841, KIF1C, KIN, KLF10, KLF2P4, KLF3, KLHL15, KMT2D, KNDC1, KREMEN1, KRT18P31, KRT8P36, KRT8P44, KRTAP10-11, KRTAP10-6, KRTAP10-9, KXD1, LAMC2, LCP2, LELP1, LEPR, LINC01085, LINC01347, LITAF, LITAFD, LLPHP2, LMF2, LNPEP, LOXHD1, LRRC19, LRRC37A16P, LSM11, LSM6P2, LSP1, MACCI, MACROH2A2, MANBA, MANSCI, MAP3K11, MAP3K15, MAP4K1, MAPK1IP1L, MAPKAPK5, MARCHF2, MARK2P8, MBD6, MCF2L2, MDH1B, MDH2, MDM4, ME2, MED15, MED28, MED9, METAP2P1, MFAP5, MFSD14C, MGRN1, MICOS10-NBL1, MID1IP1, MINK1, MITD1, MLANA, MLF2, MMAB, MMD, MMS22L, MOB3A, MOCS3, MPEG1, MPLKIP, MRPL42, MRPL49, MRPL55, MRPS23, MT-ATP6, MT-ATP8, MT-CO1, MT-CO2, MT-ND1, MT-ND4L, MT-ND5, MT-ND6, MT1P3, MTATP6P1, MTATP6P9, MTCO1P2, MTCO2P12, MTCO2P21, MTCYBP15, MTHFD1, MTHFD2P1, MTHFD2P7, MTND2P23, MTND4LP30, MTND4P30, MTND4P6, MTND4P7, MTND5P11, MTRNR2L1, MTSS1, MXRA5Y, MYH9, MYL10, MYLK3, MYO1F, NACA2, NANOGP10, NANOS1, NBEAL2, NBPFI7P, NCMAP, NCSTN, NDUFA9, NDUFS1, NEK5, NEK9, NET1, NETO1, NFIP3, NFAMI, NFASC, NFIL3, NIPAL3, NLRC5, NLRX1, NOC2LP2, NOTCH2, NPHP3, NPHS1, NPIP13, NPIP2, NPLOC4, NRBF2, NRGN, NSMCE3, NUDCD2, NUP188, NUP54, NUP62, NWD1, NXT1, OAF, OGFOD3, OR10K1, OR11G2, OR12D1, OR2A25, OR2AP1, OR4A48P, OR4C10P, OR4E2, OR52K3P, OR52Q1P, OR5H14, OR5P4P, OR7A17, OR7E94P, OR7G2, OTUB1, P2RX1, P2RX5-TAX1BP3, P2RY8, PAF1, PARVA, PATL1, PCBD2, PCBP1, PCDH11X, PCDHAC2, PCDHB2, PDE11A, PDIA3, PEX14, PHLDA3, PHYH, PIAS4, PKD1L2, PKIA, PKN3, PLCB2, PLCE1, PLD1, PLEKHA3, PLXNC1, PLXND1, PM20D2, PNMA3, PNMA6B, PNPT1, POLG2, POLR2A, PPIAP21, PPIAP22, PPIAP36, PPM1K, PRKCSH, PRKX, PRL, PRORS1P, PRSS47, PSMA7, PSMB2, PSMD10P2, PSPN, PTH, PTOV1, PTPN1, PTPN14, PTPN22, PXMP4, PYGM, PYHINI, RAB1A, RAB3B, RAB5C, RAD1, RAD51D, RASSF8, RASSF9,



|                    |                                                                                                                                                                                                                                                                                                                                                                                                                                                                                                                                                                                                                                                                                                                                                                                                                                                                                                                                                                                                                                                                                                                                                                                                                                                                                                                                                                                                                                                                                                                                                                                                                                                                                                                                                                                                                                                                                                                                                                                                                                                                                                              |
|--------------------|--------------------------------------------------------------------------------------------------------------------------------------------------------------------------------------------------------------------------------------------------------------------------------------------------------------------------------------------------------------------------------------------------------------------------------------------------------------------------------------------------------------------------------------------------------------------------------------------------------------------------------------------------------------------------------------------------------------------------------------------------------------------------------------------------------------------------------------------------------------------------------------------------------------------------------------------------------------------------------------------------------------------------------------------------------------------------------------------------------------------------------------------------------------------------------------------------------------------------------------------------------------------------------------------------------------------------------------------------------------------------------------------------------------------------------------------------------------------------------------------------------------------------------------------------------------------------------------------------------------------------------------------------------------------------------------------------------------------------------------------------------------------------------------------------------------------------------------------------------------------------------------------------------------------------------------------------------------------------------------------------------------------------------------------------------------------------------------------------------------|
|                    | <p>RBM22P2, RBM23, RBM28, RBM39, RBMS2, RBMXL2, RBPJP5, RECQL, RELCH, RETREG3, RFTN2, RGS17P1, RILPL1, RIMS1, RNA5SP279, RNA5SP282, RNA5SP286, RNA5SP338, RNA5SP346, RNA5SP508, RNA5SP90, RNA5SP97, RNASE10, RNF115, RNF133, RNF144A, RNF144B, RNF207, RNF26, RNF8, RPL10AP3, RPL12P5, RPL12P7, RPL17P1, RPL17P45, RPL19P13, RPL21P30, RPL23AP23, RPL29P32, RPL35AP2, RPL39L, RPL39P16, RPL4P2, RPL7AP23, RPL7L1, RPL7P27, RPS16P5, RPS19P7, RPS3AP10, RPS3AP13, RPS4XP2, RPS6P7, RPS7P4, RPSAP36, RRP12, RTL6, RUNX3, RWDD2A, S1PR2, SARS1, SASH3, SAT2, SBDS, SCAI, SCAND2P, SCNMI, SCO1, SDHDP3, SDR42E1, SEC14L5, SEC14L6, SEC61A1, SEMA6B, SERPINA7, SERPING1, SESN1, SETBP1, SF3A1, SF3B4, SFRP2, SGK1, SH3BGR1, SH3BGR1L3, SH3GL1, SHISA9, SHMT1, SIGLEC6, SIK2, SIRT1, SLC30A7, SLC31A2, SLC35B4, SLC38A6, SLC5A5, SLC6A17, SLC7A14, SLC7A5P2, SLC8A1, SLC9A8, SMAD9, SMCR8, SMIM11B, SNF8P1, SNX18P10, SOX3, SPI1, SPPL2A, SPRR2A, SRF, SRP9, SRRM4, ST8SIA6, STAR, STARD8, STEAP4, STK10, STKLD1, STOML1, STRIP2, STX1B, SUB1P4, SULT2A1, SUMF1, SUPT6H, SWSAP1, SYNJ2BP, SYNPO2, SYTL4, TAF11L12, TAMALIN, TANGO6, TARS1, TBX2, TCERG1, TCHHL1, TCTN3, TET3, TFE3, THAP12, TICAM1, TIMM23, TIPIN, TIRAP, TLL2, TMEM140, TMEM156, TMEM165, TMEM192, TMEM198B, TMEM209, TMEM236, TMEM252, TMEM47, TMEM70, TNFRSF9, TNFSF12, TNS4, TPH1, TPH2, TPMT, TPSB2, TPT1P12, TPT1P14, TPTEP2, TRAJ46, TRAM1L1, TRAPPC2, TRAV37, TRAV39, TRAV8-7, TRBV8-2, TRIB1, TRIM71, TRIM72, TRUB2, TSG101, TTC24, TTC39B, TTC7B, TTI2, TTYH3, TUBA5P, TXLNB, TYRL, TYRO3P, UBA52P3, UBBP2, UBE2M, UCP2, UFC1, UGT1A10, UHRF1, ULBP3, UMPS, UPF2, UPF3AP3, URAHP, USB1, USP24, USP37, USP6NL, UTP6, VIM, VNIR53P, VNIR8P, VSTM4, VWC2, WARS2P1, WASF2, WASH5P, WASH7P, WDR38, WWC1, YIPF4, YIPF6, YLPM1, YPEL5P1, YTHDC1, YWHAG, ZADH2, ZBED6, ZBTB7A, ZC3H8, ZCWPW1, ZFAND5, ZFP36L2, ZFP82, ZG16, ZIM3, ZMIZ1, ZNF141, ZNF175, ZNF37A, ZNF394, ZNF414, ZNF426, ZNF439, ZNF485, ZNF490, ZNF578, ZNF585B, ZNF593, ZNF609, ZNF654, ZNF669, ZNF699, ZNF70, ZNF710, ZNF723, ZNF813, ZNF90P1, ZNFX1, ZRANB1, ZYG11A, ZYX</p> |
| AD3-Brain (ROSMAP) | <p>ARID3C, CD9, CDC42P2, CYP2AB1P, DLSTP1, FUZ, H2BP3, HMGNI9P, HNRNPA1P23, HNRNPA3P13, IGKV3OR22-2, OR3A1, OR4H12P, RNA5SP423, RNA5SP492, RPL26P20, RPL35AP12, SMIM42, TAAR8, TCEAL6, U2AF1, ZNF37CP, ACTRT2, ADGRE1, AGR2, AKAP17BP, ANXA8L1, ARID3B, ATP5F1AP3, ATP5PDP4, BCAS4, BRD7P5, BRPF1, BTBD6, C11orf24, C9orf57, CAPNS1, CFAP100, CIITA, CLDN10, COL9A1, COP1P1, CRB3P1, CRISP1, CROCC2, CRYGGP, CSGALNACT2P2, CT45A8, CYCSP26, CYFIP2, CYP4F10P, DEPDC1, DYNC21I, EGR2, EXOC3, F12, FAM86B3P, FBXW4P1, FBXW8, GAS2L1, GPM6BP3, GPR6, H3P17, HMGB1P41, HMGNI9P30, HMGNI9P13, IFNA13, IGHJ2, IL17REL, KCNG4, KCNK1, KIFAP3, KIFBP, KRT19P1, KRTAP20-3, LCE5A, LDC1P, LHX6, LRBA, MACROH2A1, MAPK6P6, MARCHF1, MARS2, MED15P5, MED28P7, MICU1, MMP1, MRPL22P1, MRPL57P7, MTCYBP13, MTND5P10, MYO18A, NADSYN1, NDUFB4P7, NKRF, NSMCE2, NT5C3AP2, OFDIP6Y, OR10G5P, OR4A21P, OR4X7P, OR51C1P, OR5A2, P3R3URF, PHBP20, PHLDA2, PLSCR2, POTEM, PRELID3BP8, PRKAR2A, PRKRIP1, PRXL2A, PTGES3P5, PTMAP12, PTP4A1P5, RARRES2P2, RCL1, RDM1P4, RLN3, RNA5SP223, RNA5SP249, RNA5SP357, RNA5SP379, RNA5SP508, RNA5SP97, RNASE9, RNPS1P1, RPL22P23, RPL36P16, RPL4P7, RPS15AP9, RPS27AP15, RPS29P19, RPS29P32, RPS3AP5, SEC61A2, SEPTIN7P14, SLC10A6, SLC24A5, SLC5A6, SNRPGP7, SPATA21, SRMP3, STMN3, SYNCRIP, SYT12, TAAR9, TACSTD2, TAFA3, TARS2, TBX2, TCTE1, TK1, TM2D3, TMEM262, TP53TG3GP, TRBV6-2, TRMT13, TTLL11, UBE3A, UPF1, UQCRHP3, VDAC1P9, VPS13C, VWA8P1,</p>                                                                                                                                                                                                                                                                                                                                                                                                                                                                                                                                                                                                                                 |

|  |                                                                                 |
|--|---------------------------------------------------------------------------------|
|  | <i>WDR48, YYIAP1, ZAN, ZBTB2P1, ZNF114P1, ZNF212, ZNF251, ZNF513, ZNF736P4Y</i> |
|--|---------------------------------------------------------------------------------|
